# Supplementary material for: Regioselective 2,3-disubstituted porphyrins: synthesis, spectral, structural and electrochemical properties
Source: Royal Society of Chemistry journal article supplement (doi:10.1039/d3nj01288c), 2023-01-01

## Electronic Supplementary Information

# Regioselective 2,3-Disubstituted Porphyrins: Synthesis, Spectral, Structural and Electrochemical Properties

Waseem Arif and Ravi Kumar\*

Department of Chemistry, National Institute of Technology Srinagar, 190006, Jammu and Kashmir, India.

### Table of Contents (TOC)

**Figure S1.** B3LYP/6-31G optimized geometries showing top as well as side views of H<sub>2</sub>TPP(PE)<sub>2</sub> (**1a** and **1b**) and H<sub>2</sub>TPP(Ph)<sub>2</sub> (**1d** and **1e**), respectively. In side view, the β-substituents and *meso*-phenyl groups are not shown for clarity. The displacement of porphyrin-core atoms in Å from the mean plane are shown in figures **1c** and **1f** for H<sub>2</sub>TPP(PE)<sub>2</sub> and H<sub>2</sub>TPP(Ph)<sub>2</sub>, respectively. Color codes for atoms: C (black), N (blue) and H (white).

**Figure S2.** B3LYP/6-31G optimized geometries showing top as well as side views of H<sub>2</sub>TPP(CH<sub>3</sub>)<sub>2</sub> (**1a** and **1b**) and H<sub>2</sub>TPP(Br)<sub>2</sub> (**1d** and **1e**), respectively. In side view, the β-substituents and *meso*-phenyl groups are not shown for clarity. The displacement of porphyrin-core atoms in Å from the mean plane are shown in figures **1c** and **1f** for H<sub>2</sub>TPP(CH<sub>3</sub>)<sub>2</sub> and H<sub>2</sub>TPP(Br)<sub>2</sub>, respectively. Color codes for atoms: C (black), N (blue), H (white). and Br (parrot-green).

**Figure S3.** B3LYP/6-31G optimized geometries showing Frontier Molecular Orbitals (FMOs) of H<sub>2</sub>TPP(PE)<sub>2</sub> (**1a**) and H<sub>2</sub>TPP(Ph)<sub>2</sub> (**1b**), respectively.

**Figure S4.** B3LYP/6-31G optimized geometries showing Frontier Molecular Orbitals (FMOs) of H<sub>2</sub>TPP(CH<sub>3</sub>)<sub>2</sub> (**1a**) and H<sub>2</sub>TPP(Br)<sub>2</sub> (**1b**), respectively.

**Figure S5.** B3LYP/6-31G optimized geometries showing direction of dipole moment of H<sub>2</sub>TPP(PE)<sub>2</sub> (**1a**), H<sub>2</sub>TPP(Ph)<sub>2</sub> (**1b**), H<sub>2</sub>TPP(CH<sub>3</sub>)<sub>2</sub> (**1c**) and H<sub>2</sub>TPP(Br)<sub>2</sub> (**1d**), respectively.

**Figure S6.** Molecular orbital energy level diagrams of H<sub>2</sub>TPP(Br)<sub>2</sub> obtained at the B3LYP/6-31G basis set (Gaussian 16 package).

**Figure S7.** UV- Visible spectra of CuTPP(X)<sub>2</sub> (X = CH<sub>3</sub>, Ph, PE) derivatives in CH<sub>2</sub>Cl<sub>2</sub>.

**Figure S8.** UV- Visible spectra of NiTPP(X)<sub>2</sub> (X = CH<sub>3</sub>, Ph, PE) derivatives in CH<sub>2</sub>Cl<sub>2</sub>.

**Figure S9.** UV- Visible spectra of ZnTPP(X)<sub>2</sub> (X = CH<sub>3</sub>, Ph, PE) derivatives in CH<sub>2</sub>Cl<sub>2</sub>.

**Figure S10.** UV- Visible spectra of CoTPP(X)<sub>2</sub> (X = CH<sub>3</sub>, Ph, PE) derivatives in CH<sub>2</sub>Cl<sub>2</sub>.

**Figure S11.** Fluorescence spectra of ZnTPP(X)<sub>2</sub> (X = CH<sub>3</sub>, Ph, PE) derivatives in CH<sub>2</sub>Cl<sub>2</sub> at 298 K.

**Figure S12.** Cyclic voltammograms of MTPP(PE)<sub>2</sub> [M= Cu(II), Zn(II), Ni(II) and Co(II)] (~1 mM) in CH<sub>2</sub>Cl<sub>2</sub> containing 0.1 M TBAPF<sub>6</sub> using Ag/AgCl as reference electrode with a scan rate of 0.10 V/s at 298 K.

**Figure S13.** Cyclic voltammograms of (a) CuTPP(X)<sub>2</sub> [X= CH<sub>3</sub>, Ph, Br and PE] (b) NiTPP(X)<sub>2</sub> [X= CH<sub>3</sub>, Ph, Br and PE] (~1 mM) in CH<sub>2</sub>Cl<sub>2</sub> containing 0.1 M TBAPF<sub>6</sub> using Ag/AgCl as reference electrode with a scan rate of 0.10 V/s at 298 K.

**Figure S14.** Cyclic voltammograms of (a) CoTPP(X)<sub>2</sub> [X= CH<sub>3</sub>, Ph, Br and PE] (b) ZnTPP(X)<sub>2</sub> [X= CH<sub>3</sub>, Ph, Br and PE] (~1 mM) in CH<sub>2</sub>Cl<sub>2</sub> containing 0.1 M TBAPF<sub>6</sub> using Ag/AgCl as reference electrode with a scan rate of 0.10 V/s at 298 K.

**Figure S15.** <sup>1</sup>H NMR spectrum of H<sub>2</sub>TPP(Br)<sub>2</sub> in CDCl<sub>3</sub> at 298 K.

**Figure S16.** <sup>1</sup>H NMR spectrum of ZnTPP(Br)<sub>2</sub> in CDCl<sub>3</sub> at 298 K.

**Figure S17.** <sup>1</sup>H NMR spectrum of NiTPP(Br)<sub>2</sub> in CDCl<sub>3</sub> at 298 K.

**Figure S18.** <sup>1</sup>H NMR spectrum of H<sub>2</sub>TPP(CH<sub>3</sub>)<sub>2</sub> in CDCl<sub>3</sub> at 298 K.

**Figure S19.** <sup>1</sup>H NMR spectrum of NiTPP(CH<sub>3</sub>)<sub>2</sub> in CDCl<sub>3</sub> at 298 K.

**Figure S20.** <sup>1</sup>H NMR spectrum of ZnTPP(CH<sub>3</sub>)<sub>2</sub> in CDCl<sub>3</sub> at 298 K.

**Figure S21.** <sup>1</sup>H NMR spectrum of H<sub>2</sub>TPP(Ph)<sub>2</sub> in CDCl<sub>3</sub> at 298 K.

**Figure S22.** <sup>1</sup>H NMR spectrum of ZnTPP(Ph)<sub>2</sub> in CDCl<sub>3</sub> at 298 K.

**Figure S23.** <sup>1</sup>H NMR spectrum of NiTPP(Ph)<sub>2</sub> in CDCl<sub>3</sub> at 298 K.

**Figure S24.** <sup>1</sup>H NMR spectrum of H<sub>2</sub>TPP(PE)<sub>2</sub> in CDCl<sub>3</sub> at 298 K.

**Figure S25.** <sup>1</sup>H NMR spectrum of ZnTPP(PE)<sub>2</sub> in CDCl<sub>3</sub> at 298 K.

**Figure S26.** <sup>1</sup>H NMR spectrum of NiTPP(PE)<sub>2</sub> in CDCl<sub>3</sub> at 298 K.

**Figure S27.** HRMS spectrum of H<sub>2</sub>TPP(Br)<sub>2</sub>.

**Figure S28.** HRMS spectrum of ZnTPP(Br)<sub>2</sub>.

**Figure S29.** HRMS spectrum of H<sub>2</sub>TPP(CH<sub>3</sub>)<sub>2</sub>.

**Figure S30.** HRMS spectrum of CoTPP(CH<sub>3</sub>)<sub>2</sub>.

**Figure S31.** HRMS spectrum of ZnTPP(CH<sub>3</sub>)<sub>2</sub>.

**Figure S32.** HRMS spectrum of NiTPP(CH<sub>3</sub>)<sub>2</sub>.

**Figure S33.** HRMS spectrum of H<sub>2</sub>TPP(PE)<sub>2</sub>.

**Figure S34.** HRMS spectrum of CoTPP(PE)<sub>2</sub>.

**Figure S35.** HRMS spectrum of H<sub>2</sub>TPP(Ph)<sub>2</sub>.

**Figure S36.** HRMS spectrum of CuTPP(Ph)<sub>2</sub>.

**Figure S37.** HRMS spectrum of CoTPP(Ph)<sub>2</sub>.

**Figure S38.** HRMS spectrum of ZnTPP(Ph)<sub>2</sub>.

**Table S1.** Crystal structure data of H<sub>2</sub>TPP(CH<sub>3</sub>)<sub>2</sub> and CuTPP(PE)<sub>2</sub>.

**Table S2.** Selected bond lengths (Å) and bond angles (°) of H<sub>2</sub>TPP(CH<sub>3</sub>)<sub>2</sub> and CuTPP(PE)<sub>2</sub>.

**Table S3.** Selected bond lengths (Å), bond angles (°) and calculated dipole moment for the B3LYP/6-31G optimised geometries of H<sub>2</sub>TPP(X)<sub>2</sub> (X = PE, Br, Ph and CH<sub>3</sub>).

**Table S4.** Optical absorption spectral data of all the newly synthesized regioselective  $\beta$ -disubstituted free base porphyrins as well as their metal complexes.

**Table S5.** Fluorescence spectral data and quantum yield of MTPP(X)<sub>2</sub> (M = H<sub>2</sub>, Zn, and X = CH<sub>3</sub>, Ph, PE) derivatives in CH<sub>2</sub>Cl<sub>2</sub> at 298 K.

**Table S6.** Electrochemical redox data of Regioselective  $\beta$ -disubstituted porphyrins and their metal complexes MTPP(X)<sub>2</sub> [M = H<sub>2</sub>, Cu(II), Ni(II) & Zn(II), X = CH<sub>3</sub>, Ph, PE & Br]. in CH<sub>2</sub>Cl<sub>2</sub> containing 0.1 M TBAPF<sub>6</sub> with a scan rate of 0.1 V/s at 298 K.

**Table S1.** Crystal structure data of H<sub>2</sub>TPP(CH<sub>3</sub>)<sub>2</sub> and CuTPP(PE)<sub>2</sub>.

|                                        | <b>CuTPP(PE)<sub>2</sub></b>                     | <b>H<sub>2</sub>TPP(CH<sub>3</sub>)<sub>2</sub></b> |
|----------------------------------------|--------------------------------------------------|-----------------------------------------------------|
| Empirical formula                      | C <sub>60</sub> H <sub>36</sub> CuN <sub>4</sub> | C <sub>46</sub> H <sub>34</sub> N <sub>4</sub>      |
| Formula wt.                            | 876.47                                           | 642.77                                              |
| Crystal system                         | Triclinic                                        | Monoclinic                                          |
| Space group                            | P-1                                              | P2 <sub>1</sub> /n                                  |
| <i>a</i> (Å)                           | 11.6718(5)                                       | 13.9752(18)                                         |
| <i>b</i> (Å)                           | 13.6174(7)                                       | 18.392(3)                                           |
| <i>c</i> (Å)                           | 15.3876(7)                                       | 14.596(2)                                           |
| $\alpha$ (°)                           | 66.9110(10)                                      | 90                                                  |
| $\beta$ (°)                            | 82.2880(10)                                      | 116.631(4)                                          |
| $\gamma$ (°)                           | 67.6690(10)                                      | 90                                                  |
| Volume (Å <sup>3</sup> )               | 2080.75(17)                                      | 3353.5(8)                                           |
| <i>Z</i>                               | 2                                                | 4                                                   |
| D <sub>calc</sub> (g/cm <sup>3</sup> ) | 1.399                                            | 1.273                                               |
| Wavelength (Å)                         | 0.71073                                          | 0.71073                                             |
| T (°C)                                 | 296.15 K                                         | 273.15 K                                            |
| No. of total reflns.                   | 26360                                            | 53314                                               |
| No. of indepnt.reflns.                 | 7316                                             | 8319                                                |
| R <sup>a</sup>                         | 0.0291                                           | 0.0563                                              |
| R <sup>b</sup>                         | 0.0287                                           | 0.0385                                              |
| CCDC                                   | 2237993                                          | 2242270                                             |

**Table S2.** Selected bond lengths (Å) and bond angles (°) of CuTPP(PE)<sub>2</sub> and H<sub>2</sub>TPP(CH<sub>3</sub>)<sub>2</sub>.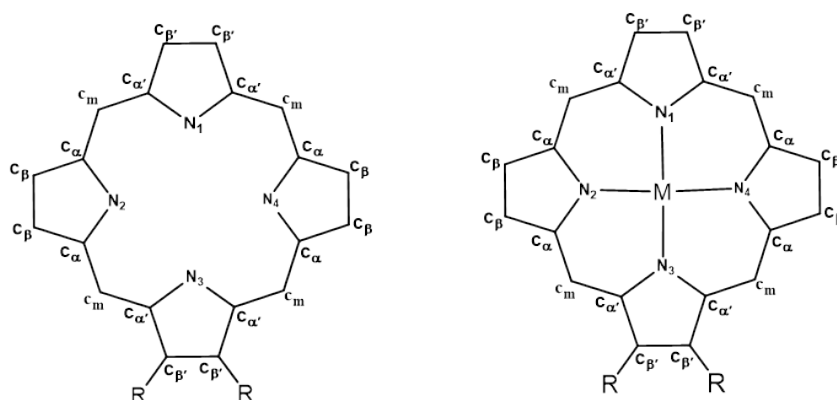R = CH<sub>3</sub> & PE and M = Cu

### Bond Length (Å)

|                                       | CuTPP(PE) <sub>2</sub> | H <sub>2</sub> TPP(CH <sub>3</sub> ) <sub>2</sub> |
|---------------------------------------|------------------------|---------------------------------------------------|
| <b>M-N</b>                            | 1.979                  | -                                                 |
| M-N'                                  | 2.017                  | -                                                 |
| N-C <sub>α</sub>                      | 1.381                  | 1.374                                             |
| N'-C <sub>α</sub>                     | 1.386                  | 1.375                                             |
| C <sub>α</sub> -C <sub>β</sub>        | 1.442                  | 1.454                                             |
| C <sub>α</sub> '-C <sub>β</sub> '     | 1.446                  | 1.441                                             |
| <b>C<sub>β</sub>-C<sub>β</sub></b>    | 1.344                  | 1.347                                             |
| C <sub>β</sub> '-C <sub>β</sub> '     | 1.367                  | 1.370                                             |
| C <sub>α</sub> -C <sub>m</sub>        | 1.397                  | 1.406                                             |
| C <sub>α</sub> '-C <sub>m</sub>       | 1.396                  | 1.403                                             |
| <b>ΔC<sub>β</sub> (Å)<sup>a</sup></b> | 0.287                  | 0.162                                             |
| <b>Δ24 (Å)<sup>b</sup></b>            | 0.173                  | 0.096                                             |
| <b>ΔMetal (Å)</b>                     | 0.013                  | -                                                 |

### Bond Angle (deg)

|                                                    |        |        |
|----------------------------------------------------|--------|--------|
| <b>M-N-C<sub>α</sub></b>                           | 127.23 | -      |
| M-N'-C <sub>α</sub>                                | 126.77 | -      |
| N-M-N                                              | 177.04 | -      |
| N'-M-N'                                            | 177.23 | -      |
| <b>N-C<sub>α</sub>-C<sub>m</sub></b>               | 125.94 | 126.64 |
| N'-C <sub>α</sub> '-C <sub>m</sub>                 | 125.48 | 124.89 |
| N-C <sub>α</sub> -C <sub>β</sub>                   | 109.94 | 110.27 |
| N'-C <sub>α</sub> '-C <sub>β</sub> '               | 110.02 | 107.48 |
| <b>C<sub>β</sub>-C<sub>α</sub>-C<sub>m</sub></b>   | 124.02 | 122.93 |
| C <sub>β</sub> '-C <sub>α</sub> '-C <sub>m</sub>   | 124.47 | 125.85 |
| C <sub>α</sub> -C <sub>m</sub> -C <sub>α</sub> '   | 123.35 | 125.69 |
| C <sub>α</sub> -C <sub>β</sub> -C <sub>β</sub>     | 107.26 | 106.83 |
| C <sub>α</sub> '-C <sub>β</sub> '-C <sub>β</sub> ' | 106.86 | 107.72 |
| C <sub>α</sub> -N-C <sub>α</sub>                   | 105.46 | 105.75 |
| C <sub>α</sub> '-N-C <sub>α</sub> '                | 106.21 | 109.57 |

<sup>a</sup>ΔC<sub>β</sub> refers to the mean plane displacement of the β-pyrrole carbons

<sup>b</sup>Δ24 refers to the mean plane deviation of 24-atom core

esd's for all given bond length and bond angles are ± 6%

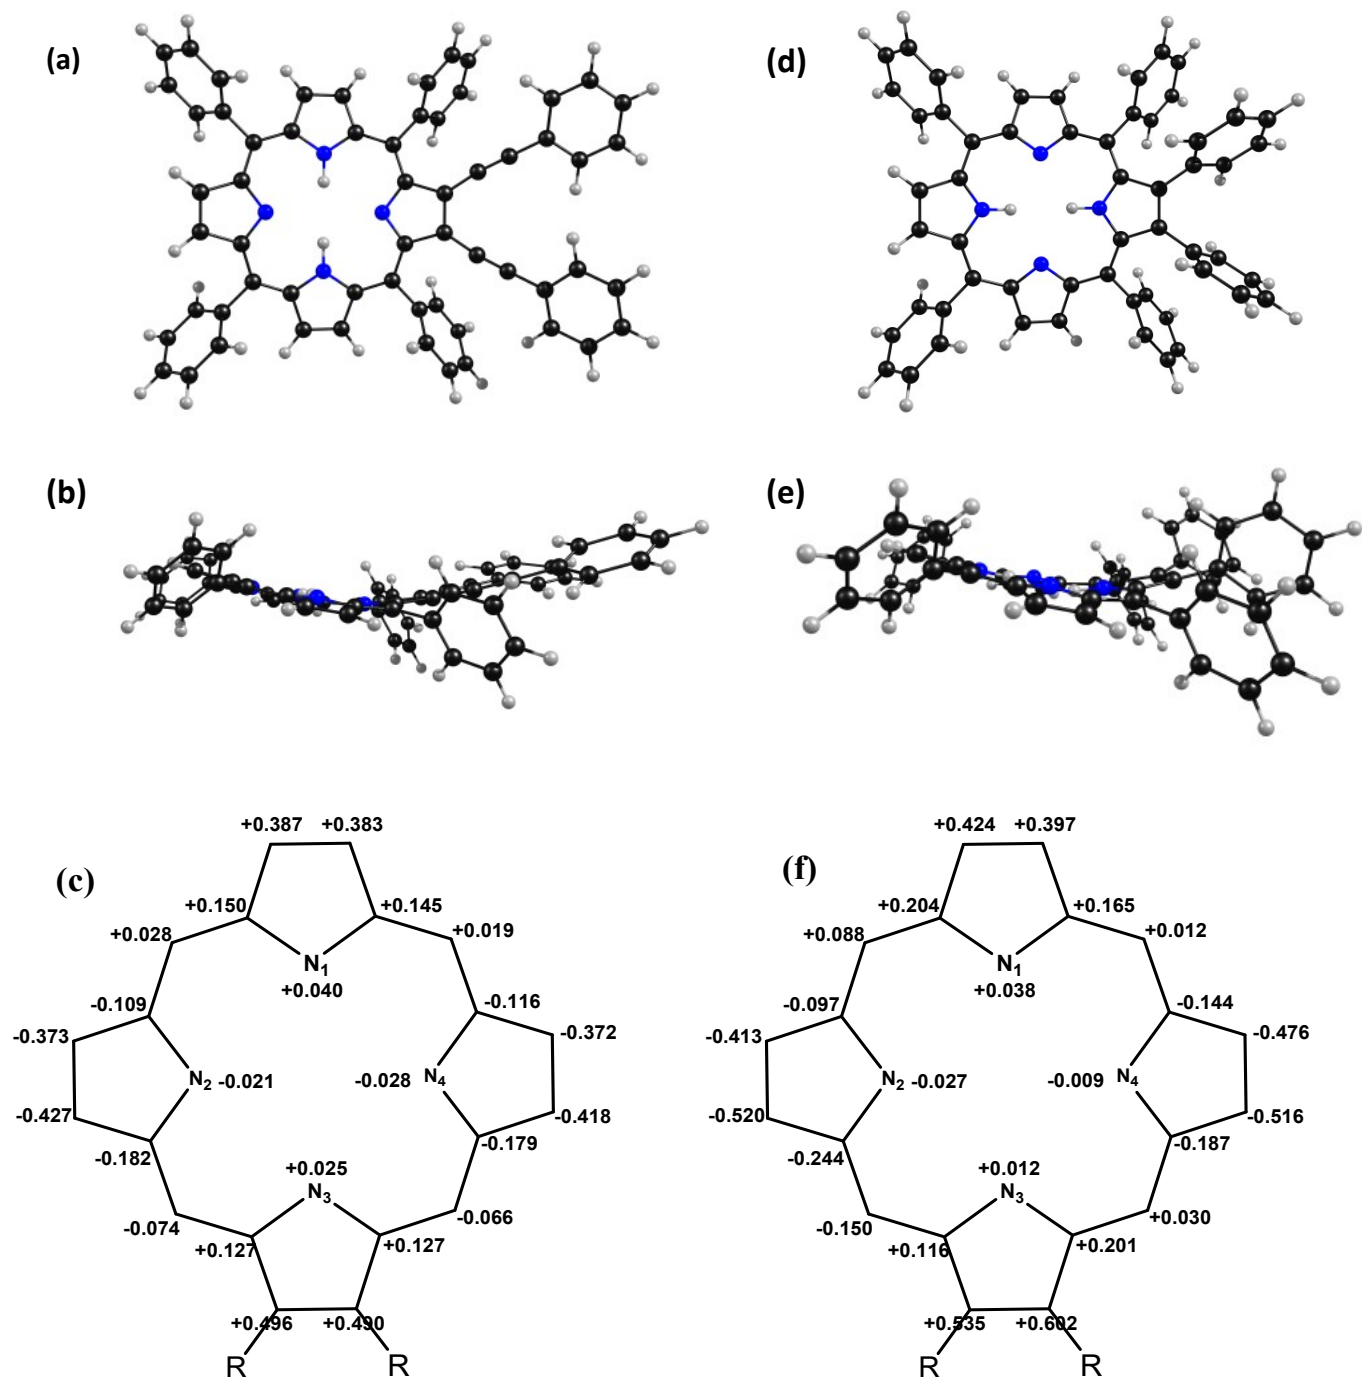

**Figure S1.** B3LYP/6-31G optimized geometries showing top as well as side views of  $\text{H}_2\text{TPP}(\text{PE})_2$  (**1a** and **1b**) and  $\text{H}_2\text{TPP}(\text{Ph})_2$  (**1d** and **1e**), respectively. The displacement of porphyrin-core atoms in Å from the mean plane are shown in figures **1c** and **1f** for  $\text{H}_2\text{TPP}(\text{PE})_2$  and  $\text{H}_2\text{TPP}(\text{Ph})_2$ , respectively. Color codes for atoms: C (black), N (blue) and H (white).

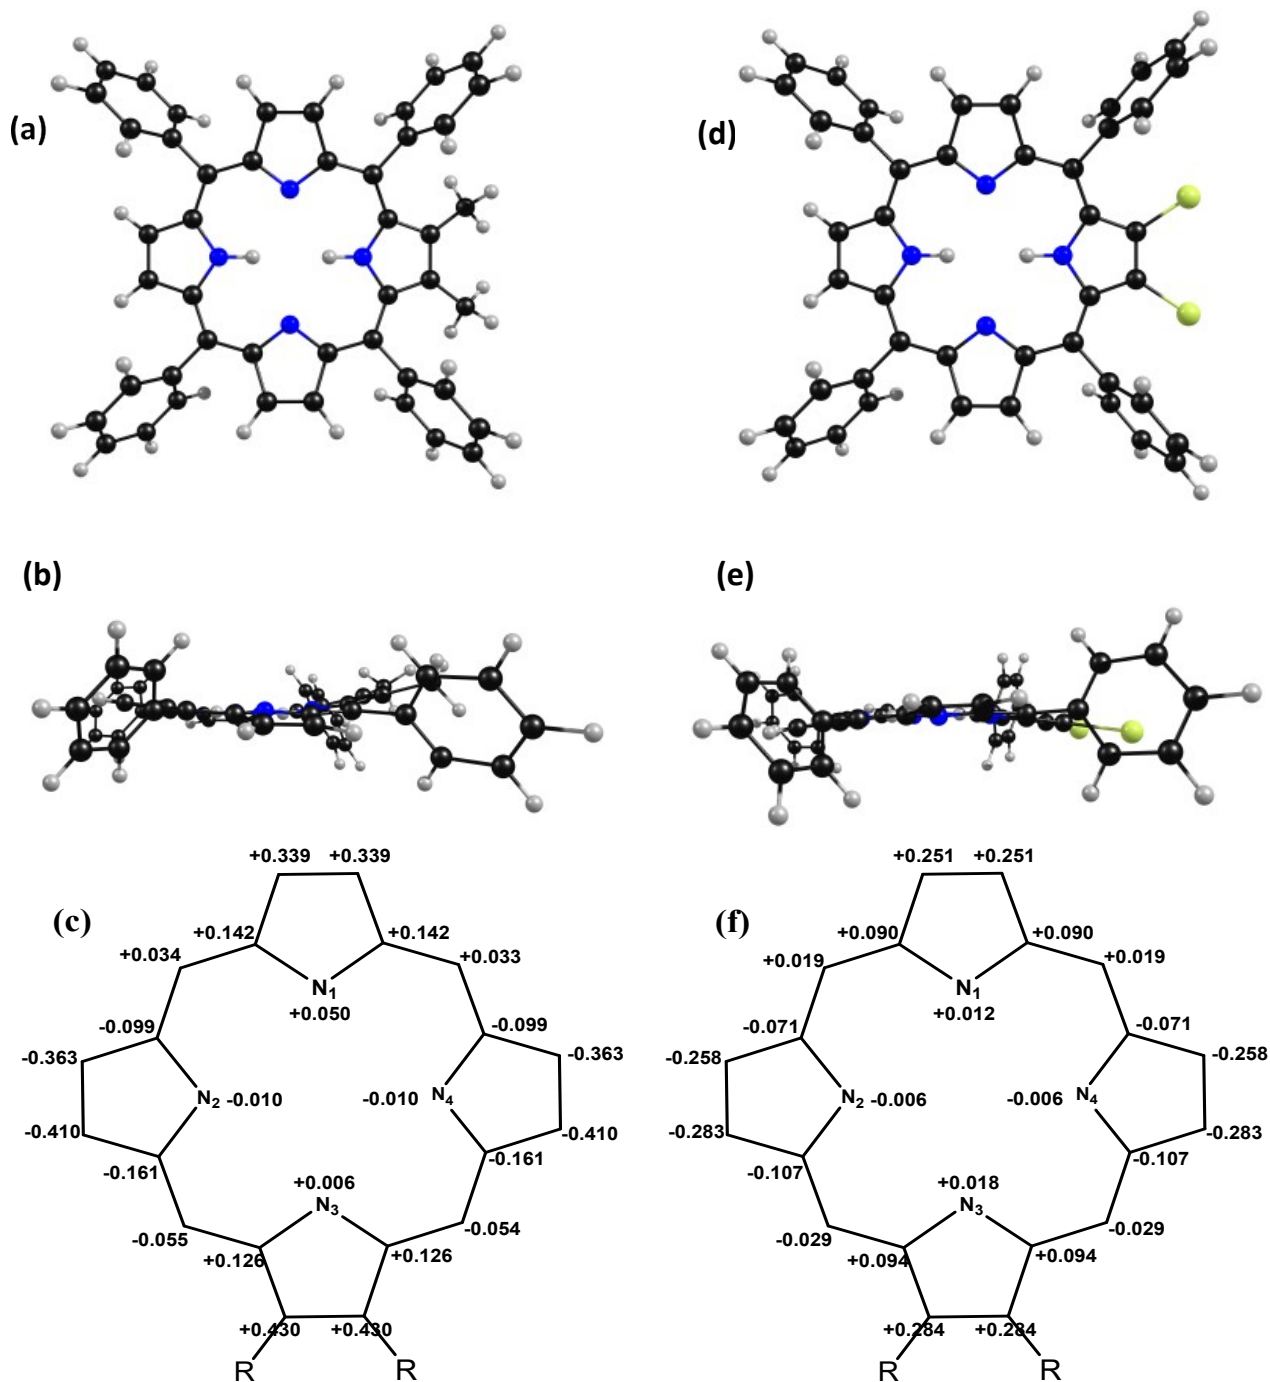

**Figure S2.** B3LYP/6-31G optimized geometries showing top as well as side views of  $\text{H}_2\text{TPP}(\text{CH}_3)_2$  (1a and 1b) and  $\text{H}_2\text{TPP}(\text{Br})_2$  (1d and 1e), respectively. The displacement of porphyrin-core atoms in Å from the mean plane are shown in figures 1c and 1f for  $\text{H}_2\text{TPP}(\text{CH}_3)_2$  and  $\text{H}_2\text{TPP}(\text{Br})_2$ , respectively. Color codes for atoms: C (black), N (blue), H (white) and Br (parrot-green).

**Table S3.** Selected bond lengths (Å), bond angles (°) and calculated dipole moment for the B3LYP/6-31G optimised geometries of H<sub>2</sub>TPP(X)<sub>2</sub> (X = PE, CH<sub>3</sub>, Ph and Br).

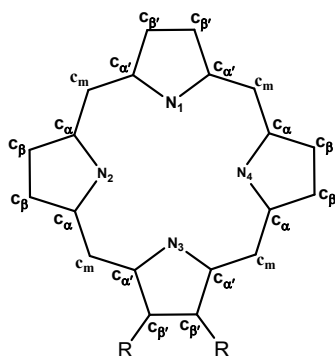

R = CH<sub>3</sub>, PE, Ph & Br

|                                                   | H <sub>2</sub> TPP(PE) <sub>2</sub> | H <sub>2</sub> TPP(CH <sub>3</sub> ) <sub>2</sub> | H <sub>2</sub> TPP(Ph) <sub>2</sub> | H <sub>2</sub> TPP(Br) <sub>2</sub> |
|---------------------------------------------------|-------------------------------------|---------------------------------------------------|-------------------------------------|-------------------------------------|
| <b>Bond Length (Å)</b>                            |                                     |                                                   |                                     |                                     |
| N-C <sub>α</sub>                                  | 1.386                               | 1.383                                             | 1.382                               | 1.384                               |
| N'-C <sub>α</sub>                                 | 1.381                               | 1.385                                             | 1.386                               | 1.387                               |
| C <sub>α</sub> -C <sub>β</sub>                    | 1.439                               | 1.464                                             | 1.464                               | 1.465                               |
| C <sub>α'</sub> -C <sub>β'</sub>                  | 1.467                               | 1.446                                             | 1.445                               | 1.439                               |
| C <sub>β</sub> -C <sub>β</sub>                    | 1.373                               | 1.359                                             | 1.357                               | 1.358                               |
| C <sub>β'</sub> -C <sub>β'</sub>                  | 1.379                               | 1.382                                             | 1.385                               | 1.375                               |
| C <sub>α</sub> -C <sub>m</sub>                    | 1.406                               | 1.413                                             | 1.412                               | 1.411                               |
| C <sub>α'</sub> -C <sub>m</sub>                   | 1.413                               | 1.407                                             | 1.408                               | 1.406                               |
| ΔC <sub>β</sub> (Å) <sup>a</sup>                  | 0.418                               | 0.386                                             | 0.485                               | 0.269                               |
| Δ24 (Å) <sup>b</sup>                              | 0.199                               | 0.183                                             | 0.236                               | 0.125                               |
| <b>Bond Angle (deg)</b>                           |                                     |                                                   |                                     |                                     |
| N-C <sub>α</sub> -C <sub>m</sub>                  | 127.14                              | 126.65                                            | 126.32                              | 126.88                              |
| N'-C <sub>α</sub> -C <sub>m</sub>                 | 125.33                              | 125.39                                            | 125.47                              | 125.85                              |
| N-C <sub>α</sub> -C <sub>β</sub>                  | 106.25                              | 110.27                                            | 110.25                              | 110.39                              |
| N'-C <sub>α</sub> -C <sub>β'</sub>                | 110.15                              | 106.41                                            | 106.36                              | 106.03                              |
| C <sub>β</sub> -C <sub>α</sub> -C <sub>m</sub>    | 126.58                              | 123.06                                            | 123.41                              | 123.47                              |
| C <sub>β'</sub> -C <sub>α'</sub> -C <sub>m</sub>  | 124.76                              | 128.27                                            | 128.12                              | 128.36                              |
| C <sub>α</sub> -C <sub>m</sub> -C <sub>α'</sub>   | 124.92                              | 125.25                                            | 124.78                              | 125.22                              |
| C <sub>α</sub> -C <sub>β</sub> -C <sub>β</sub>    | 108.39                              | 106.82                                            | 106.82                              | 106.79                              |
| C <sub>α'</sub> -C <sub>β'</sub> -C <sub>β'</sub> | 106.51                              | 108.12                                            | 108.09                              | 108.56                              |
| C <sub>α</sub> -N-C <sub>α</sub>                  | 110.68                              | 105.76                                            | 106.31                              | 106.11                              |
| C <sub>α'</sub> -N-C <sub>α'</sub>                | 107.05                              | 110.86                                            | 110.96                              | 111.27                              |
| <b>Dipole moment</b>                              | 0.884D                              |                                                   | 0.467D                              | 2.956D                              |

<sup>a</sup>ΔC<sub>β</sub> refers to the mean plane displacement of the β-pyrrole carbons

<sup>b</sup>Δ24 refers to the mean plane deviation of 24-atom core



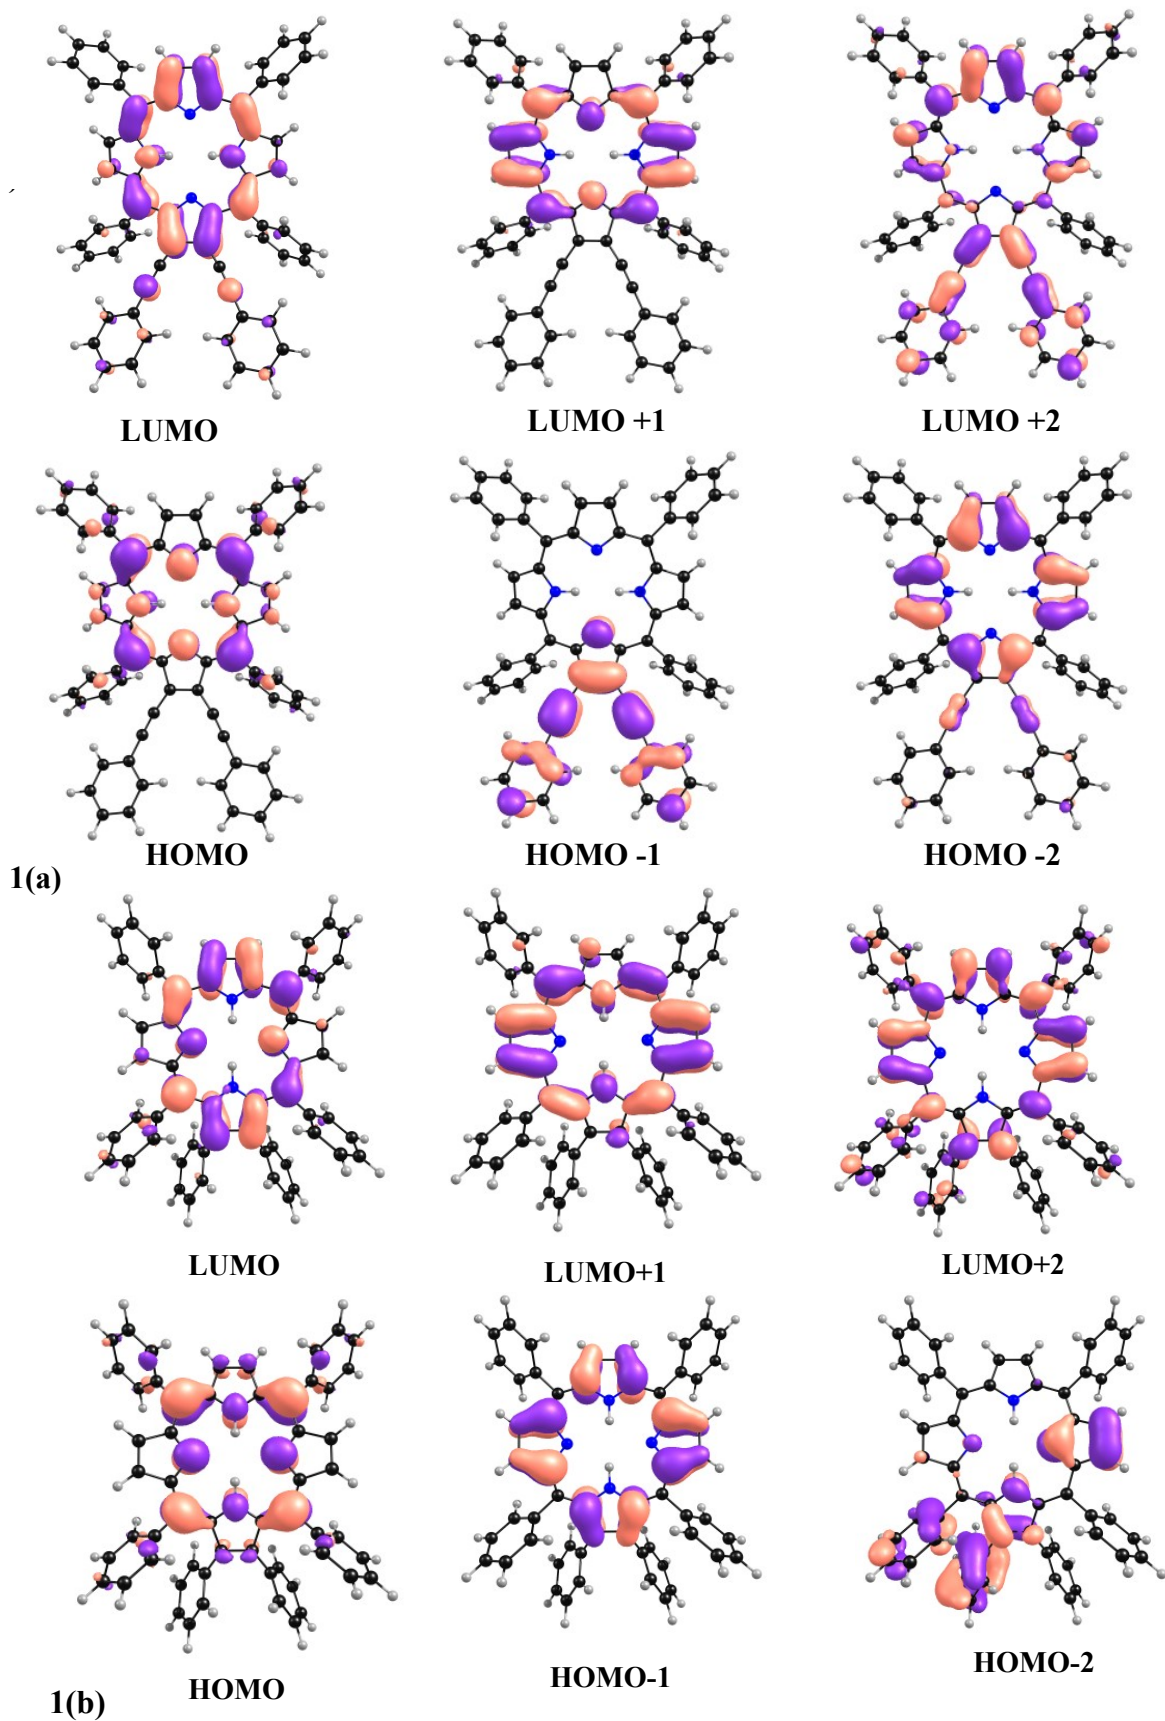

**Figure S3.** B3LYP/6-31G optimised geometries showing Frontier Molecular Orbitals (FMOs) of  $\text{H}_2\text{TPP}(\text{PE})_2$  (1a) and  $\text{H}_2\text{TPP}(\text{Ph})_2$  (1b), respectively (having isosurface contour value of 0.03)

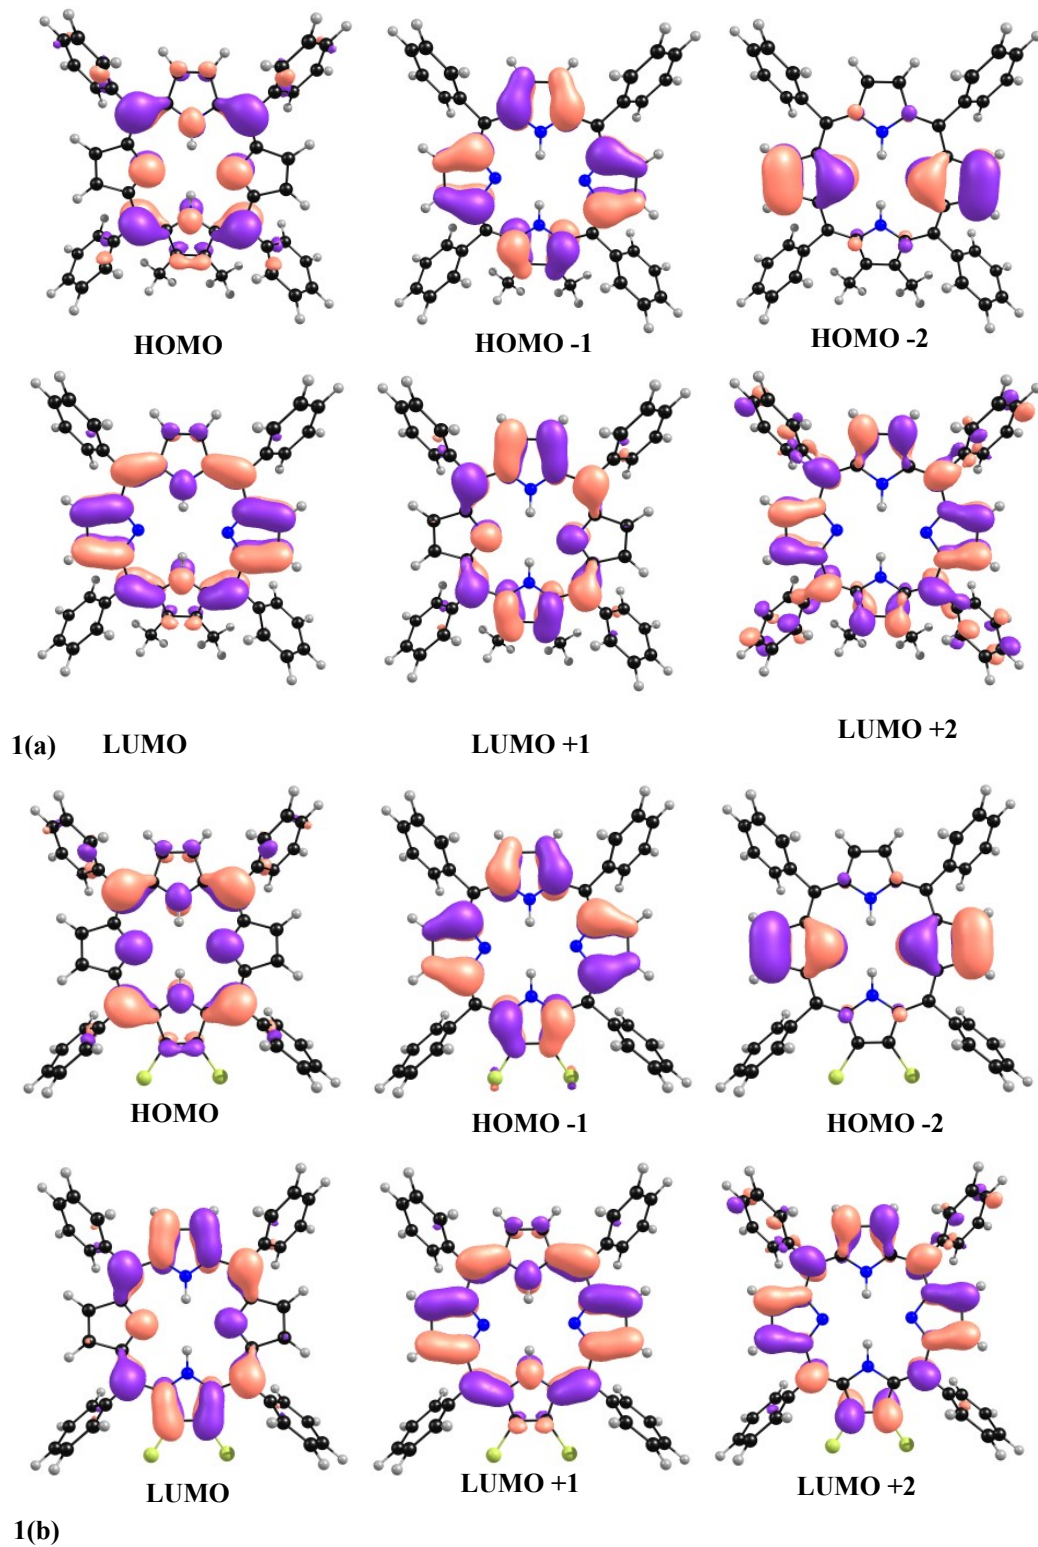

**Figure S4.** B3LYP/6-31G optimized geometries showing Frontier Molecular Orbitals (FMOs) of  $\text{H}_2\text{TPP}(\text{CH}_3)_2$  (1a) and  $\text{H}_2\text{TPP}(\text{Br})_2$  (1b), respectively (having isosurface contour value of 0.03).

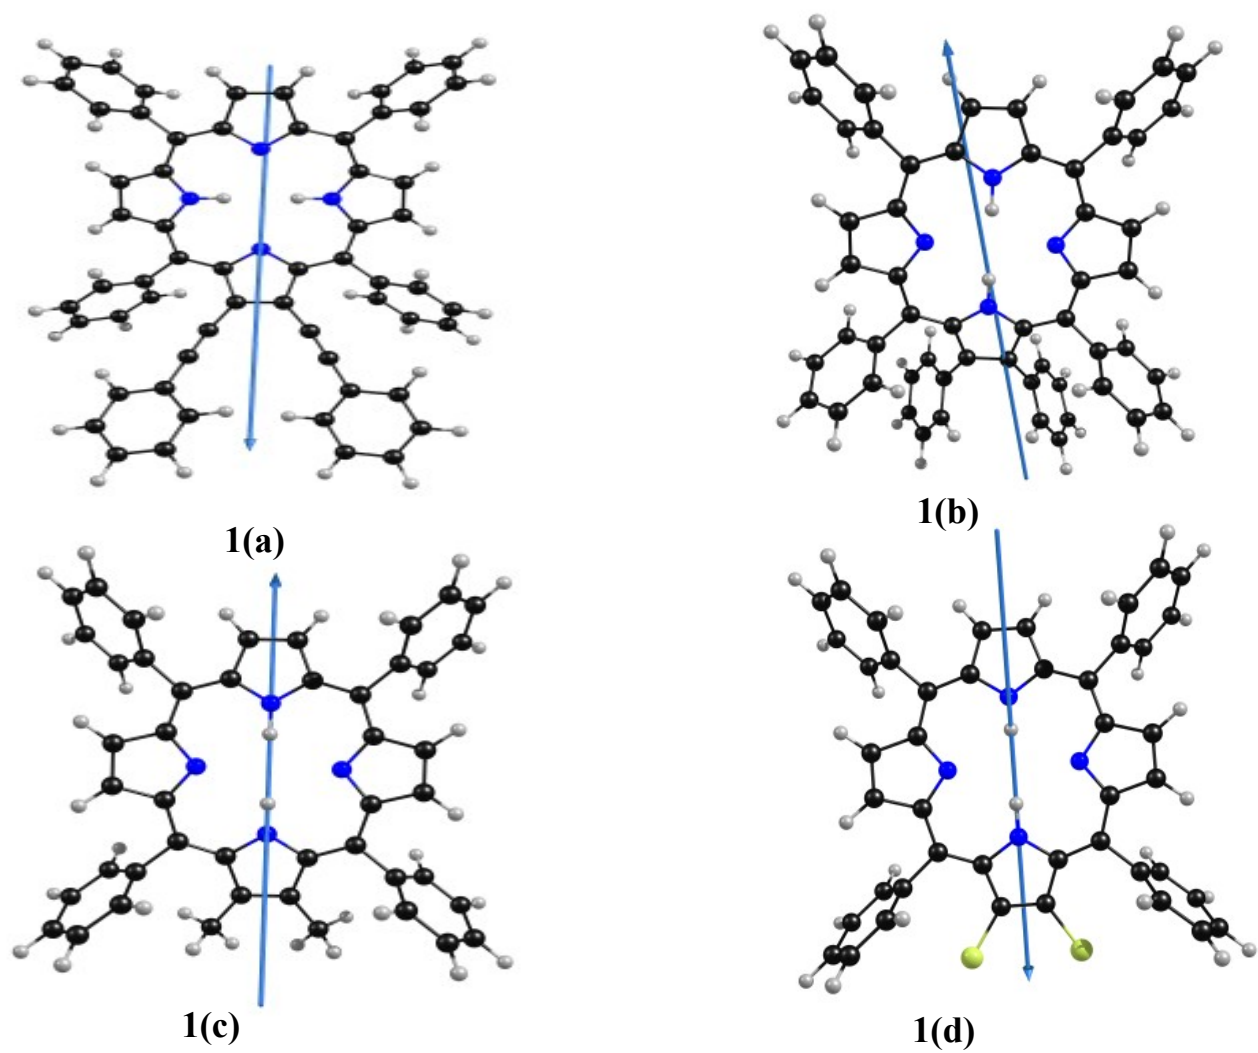

**Figure S5.** B3LYP/6-31G optimized geometries showing direction of dipole moment of  $\text{H}_2\text{TPP}(\text{PE})_2$  (1a),  $\text{H}_2\text{TPP}(\text{Ph})_2$  (1b),  $\text{H}_2\text{TPP}(\text{CH}_3)_2$  (1c) and  $\text{H}_2\text{TPP}(\text{Br})_2$  (1d), respectively.

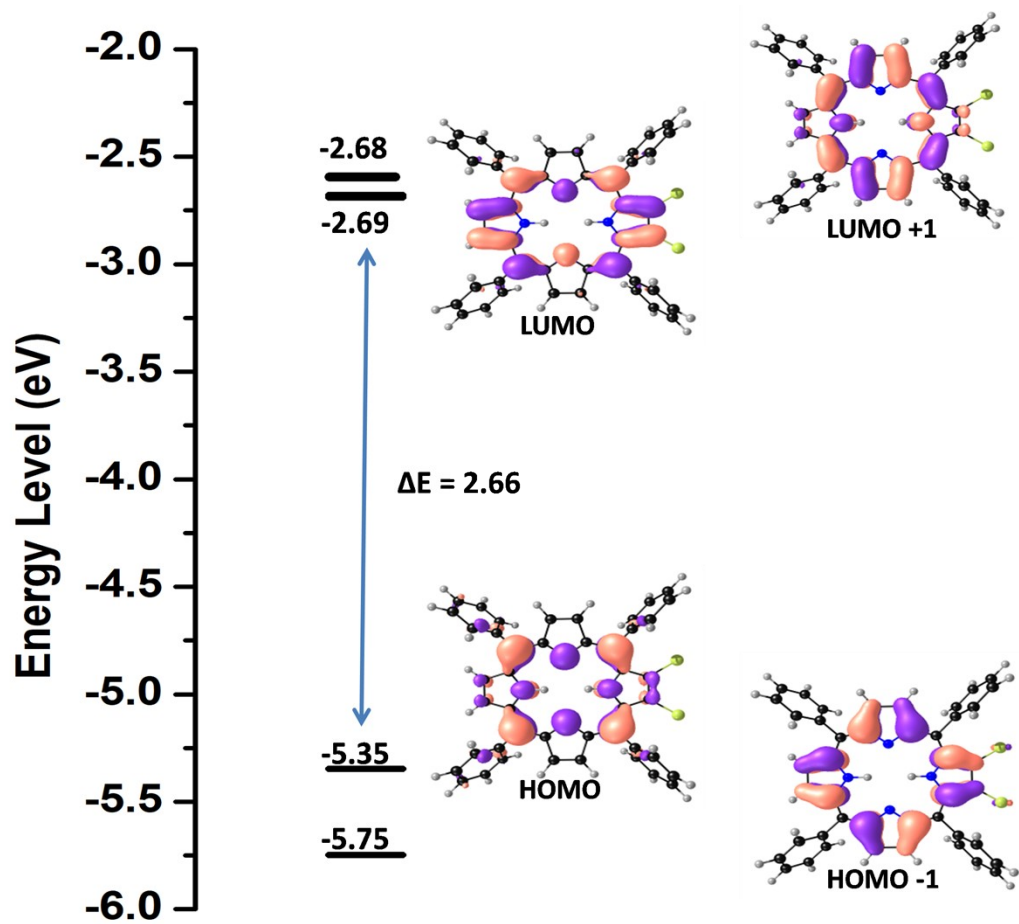

**Figure S6.** Molecular orbital energy level diagrams of  $\text{H}_2\text{TPP}(\text{Br})_2$  obtained at the B3LYP/6-31G basis set (Gaussian 16 package).

**Table S4.** Optical absorption spectral data of all the newly synthesized regioselective  $\beta$ -disubstituted free base porphyrins as well as their metal complexes. Values in parentheses refer to  $\log \epsilon$  ( $\epsilon$  in  $\text{Mol}^{-1} \text{cm}^{-1}$ ).

| <b>Porphyrins</b>                                 | <b>Soret band, (nm)</b> | <b>Q band(s), (nm)</b>                         |
|---------------------------------------------------|-------------------------|------------------------------------------------|
| H <sub>2</sub> TPP(Br) <sub>2</sub>               | 424 (5.19)              | 521 (4.22), 560 (sh), 598 (3.71), 656 (3.78)   |
| H <sub>2</sub> TPP(PE) <sub>2</sub>               | 438 (5.46)              | 529 (4.35), 567 (3.96), 610 (3.87), 668 (3.76) |
| H <sub>2</sub> TPP(Ph) <sub>2</sub>               | 424 (5.53)              | 519 (4.27), 555 (3.84), 595 (3.78), 653 (3.53) |
| H <sub>2</sub> TPP(CH <sub>3</sub> ) <sub>2</sub> | 419 (5.50)              | 516 (3.65), 588 (3.65), 643 (3.72)             |
| CuTPP(Br) <sub>2</sub>                            | 420 (5.58)              | 544 (4.33)                                     |
| CuTPP(PE) <sub>2</sub>                            | 437 (5.50)              | 557 (3.86), 598 (3.60)                         |
| CuTPP(Ph) <sub>2</sub>                            | 420 (5.50)              | 544 (4.20)                                     |
| CuTPP(CH <sub>3</sub> ) <sub>2</sub>              | 416 (5.36)              | 541 (3.25)                                     |
| CoTPP(Br) <sub>2</sub>                            | 417 (5.58)              | 538 (4.42)                                     |
| CoTPP(PE) <sub>2</sub>                            | 433 (5.37)              | 549 (3.40), 589 (3.44)                         |
| CoTPP(Ph) <sub>2</sub>                            | 416 (5.34)              | 537 (4.19)                                     |
| CoTPP(CH <sub>3</sub> ) <sub>2</sub>              | 411 (5.37)              | 533 (4.45)                                     |
| NiTPP(Br) <sub>2</sub>                            | 422 (5.47)              | 538 (4.30)                                     |
| NiTPP(PE) <sub>2</sub>                            | 438 (5.54)              | 548 (4.41), 593 (4.38)                         |
| NiTPP(Ph) <sub>2</sub>                            | 422 (5.36)              | 538 (4.18)                                     |
| NiTPP(CH <sub>3</sub> ) <sub>2</sub>              | 417 (5.32)              | 534 (3.38)                                     |
| ZnTPP(Br) <sub>2</sub>                            | 424 (5.48)              | 553 (4.28)                                     |
| ZnTPP(PE) <sub>2</sub>                            | 442 (5.61)              | 565 (4.15), 607 (3.91)                         |
| ZnTPP(Ph) <sub>2</sub>                            | 423 (5.57)              | 552 (4.22),                                    |
| ZnTPP(CH <sub>3</sub> ) <sub>2</sub>              | 418(5.43)               | 548 (3.88)                                     |



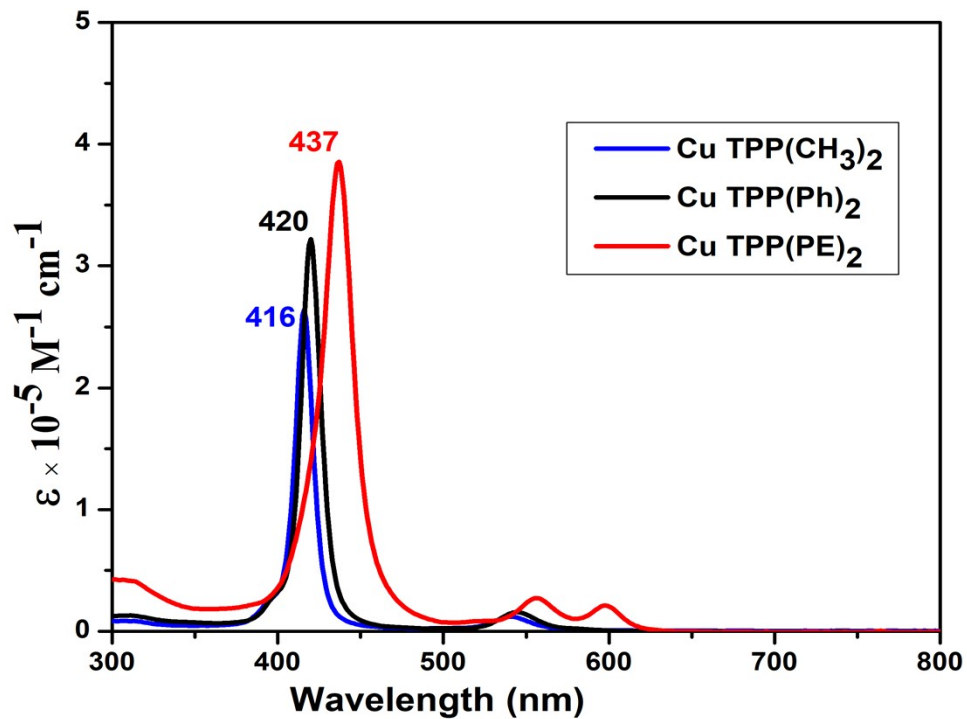

**Figure S7.** UV- Visible spectra of CuTPP(X)<sub>2</sub> (X = CH<sub>3</sub>, Ph, PE) derivatives in CH<sub>2</sub>Cl<sub>2</sub>.

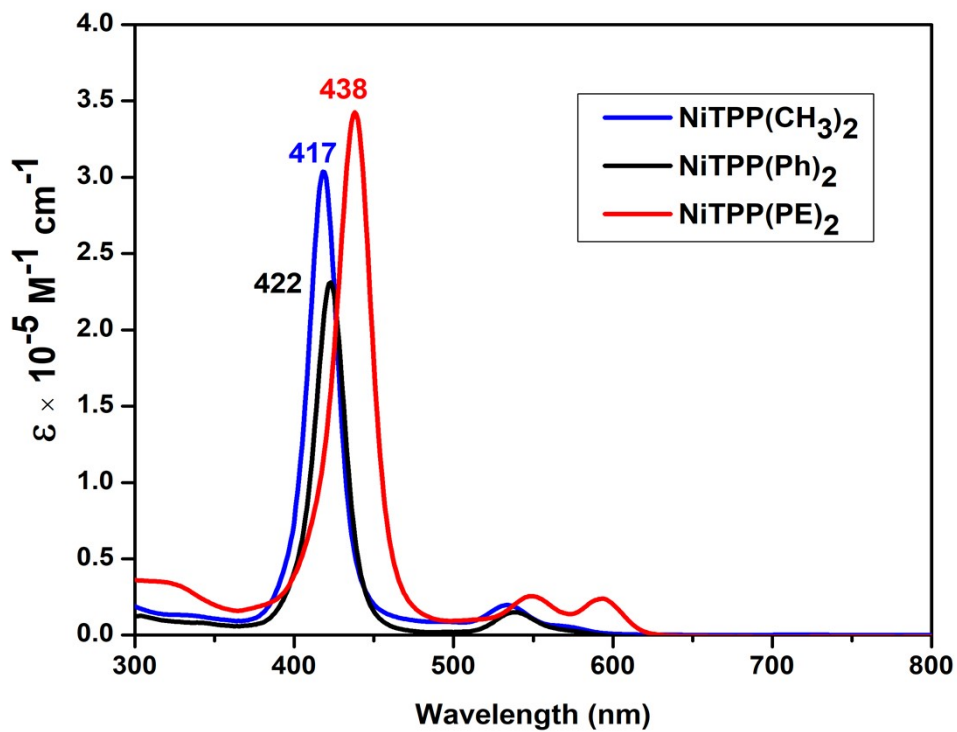

**Figure S8.** UV- Visible spectra of NiTPP(X)<sub>2</sub> (X = CH<sub>3</sub>, Ph, PE) derivatives in CH<sub>2</sub>Cl<sub>2</sub>.

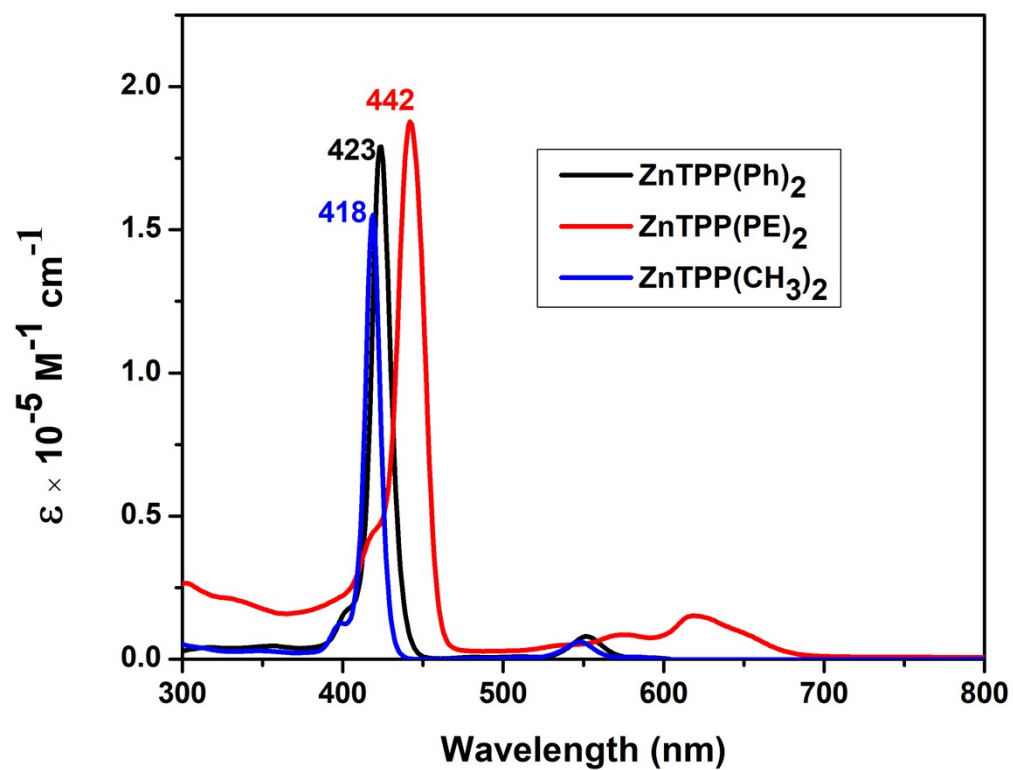

Figure S9. UV- Visible spectra of ZnTPP(X)<sub>2</sub> (X = CH<sub>3</sub>, Ph, PE) derivatives in CH<sub>2</sub>Cl<sub>2</sub>.

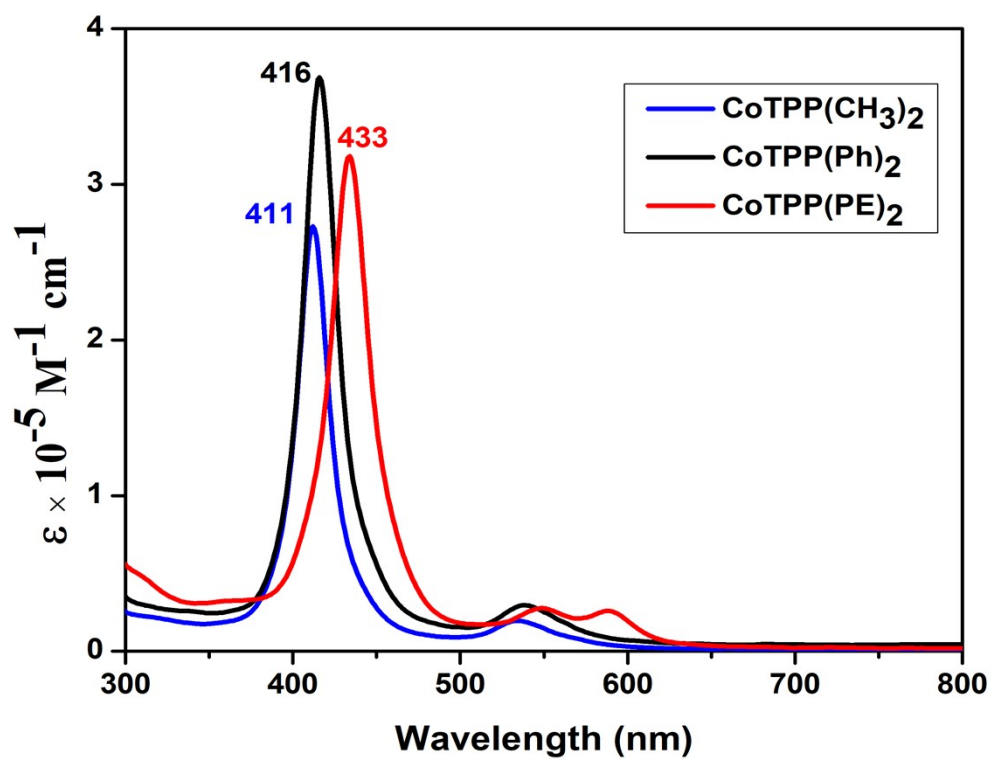

Figure S10. UV- Visible spectra of CoTPP(X)<sub>2</sub> (X = CH<sub>3</sub>, Ph, PE) derivatives in CH<sub>2</sub>Cl<sub>2</sub>.

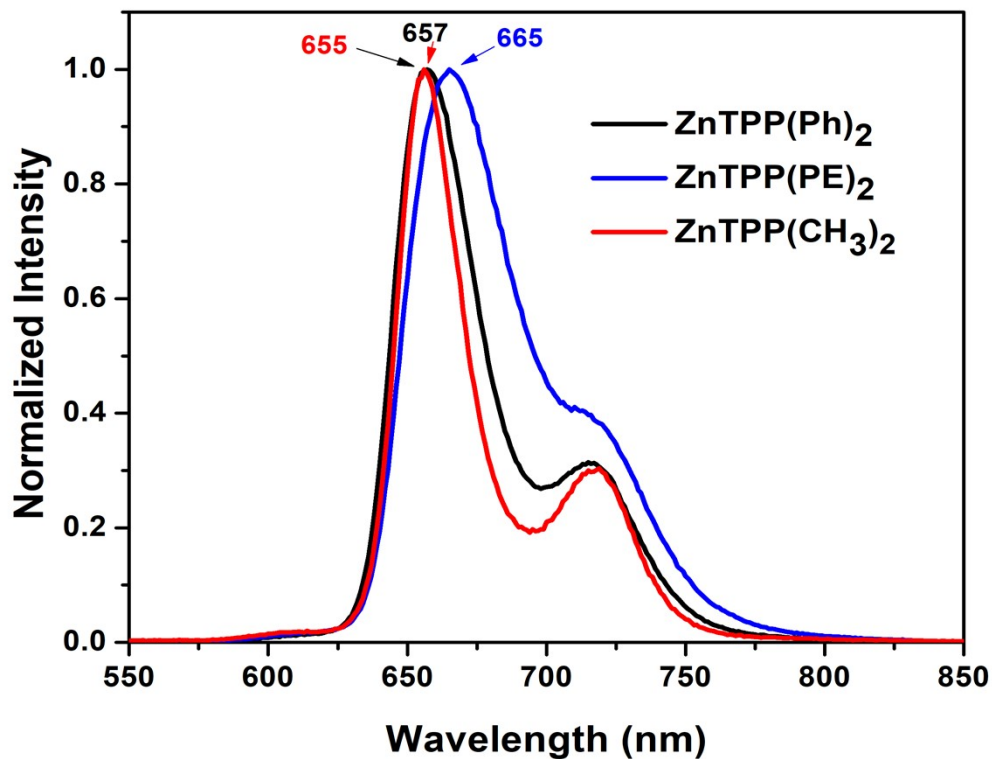

**Figure S11.** Fluorescence spectra of ZnTPP(X)<sub>2</sub> (X = CH<sub>3</sub>, Ph, PE) derivatives in CH<sub>2</sub>Cl<sub>2</sub> at 298 K.

**Table S5.** Fluorescence spectral data of ZnTPP(X)<sub>2</sub> (X = Br, CH<sub>3</sub>, Ph, PE) derivatives in CH<sub>2</sub>Cl<sub>2</sub> at 298 K, ( $\Phi_f$  = quantum yield relative to those of ZnTPP in DCM).

| Porphyrins                           | $\lambda$ excitation, nm | $\lambda$ emission, nm | $\Phi_f$ |
|--------------------------------------|--------------------------|------------------------|----------|
| ZnTPP(Br) <sub>2</sub>               | 424                      | 652                    | 0.0012   |
| ZnTPP(CH <sub>3</sub> ) <sub>2</sub> | 418                      | 655                    | 0.0152   |
| ZnTPP(Ph) <sub>2</sub>               | 423                      | 657                    | 0.0136   |
| ZnTPP(PE) <sub>2</sub>               | 442                      | 665                    | 0.0281   |



**Table S6.** Electrochemical redox data of regioselective  $\beta$ -disubstituted porphyrins and their metal complexes MTPP(X)<sub>2</sub> [M = H<sub>2</sub>, Cu(II), Ni(II) & Zn(II), X = CH<sub>3</sub>, Ph, PE & Br] in CH<sub>2</sub>Cl<sub>2</sub> containing 0.1 M TBAPF<sub>6</sub> with a scan rate of 0.1 V/s at 298 K.

| Porphyrins                                        | Oxidation (V) |        |         | Reduction (V) |        |         | $\Delta E$ (V) |
|---------------------------------------------------|---------------|--------|---------|---------------|--------|---------|----------------|
|                                                   | I-Oxd         | II-Oxd | III-Oxd | I-Red         | II-Red | III-Red |                |
| H <sub>2</sub> TPP(PE) <sub>2</sub>               | 1.05          | 1.27   |         | -0.99         | -1.23  |         | 2.04           |
| CuTPP(PE) <sub>2</sub>                            | 1.00          | 1.39   |         | -1.17         | -1.49  |         | 2.17           |
| CoTPP(PE) <sub>2</sub>                            | 0.89          | 1.12   | 1.31    | -0.72         | -1.16  | -1.49   | 2.28           |
| NiTPP(PE) <sub>2</sub>                            | 1.08          | 1.35   | 1.84    | -1.11         | -1.39  |         | 2.19           |
| ZnTPP(PE) <sub>2</sub>                            | 0.88          | 1.13   |         | -1.22         | -1.50  |         | 2.10           |
| H <sub>2</sub> TPP(Br) <sub>2</sub>               | 1.07          | 1.26   |         | -1.01         | -1.19  |         | 2.08           |
| CuTPP(Br) <sub>2</sub>                            | 1.02          | 1.42   |         | -1.16         | -1.48  |         | 2.18           |
| CoTPP(Br) <sub>2</sub>                            | 0.93          | 1.14   | 1.33    | -0.72         | -1.23  |         | 2.37           |
| NiTPP(Br) <sub>2</sub>                            | 1.13          | 1.34   |         | -1.14         | -1.39  |         | 2.27           |
| ZnTPP(Br) <sub>2</sub>                            | 0.91          | 1.15   |         | -1.31         | -1.50  |         | 2.22           |
| H <sub>2</sub> TPP(Ph) <sub>2</sub>               | 0.93          | 1.12   |         | -1.21         | -1.36  |         | 2.14           |
| CuTPP(Ph) <sub>2</sub>                            | 0.85          | 1.26   |         | -1.32         | -1.60  |         | 2.17           |
| CoTPP(Ph) <sub>2</sub>                            | 0.95          | 1.17   | 1.56    | -0.83         | -1.21  |         | 2.38           |
| NiTPP(Ph) <sub>2</sub>                            | 0.98          | 1.31   | 1.86    | -1.24         |        |         | 2.22           |
| ZnTPP(Ph) <sub>2</sub>                            | 0.87          | 1.07   |         | -1.38         | -1.48  |         | 2.25           |
| H <sub>2</sub> TPP(CH <sub>3</sub> ) <sub>2</sub> | 0.94          | 1.15   |         | -1.22         | -1.55  |         | 2.16           |
| CuTPP(CH <sub>3</sub> ) <sub>2</sub>              | 0.87          | 1.28   |         | -1.31         | -1.51  |         | 2.18           |
| CoTPP(CH <sub>3</sub> ) <sub>2</sub>              | 0.83          | 1.04   | 1.20    | -0.81         | -1.05  |         | 2.09           |
| NiTPP(CH <sub>3</sub> ) <sub>2</sub>              | 0.96          | 1.30   | 1.83    | -1.20         |        |         | 2.16           |
| ZnTPP(CH <sub>3</sub> ) <sub>2</sub>              | 0.81          | 1.01   |         | -1.41         | -1.60  |         | 2.22           |

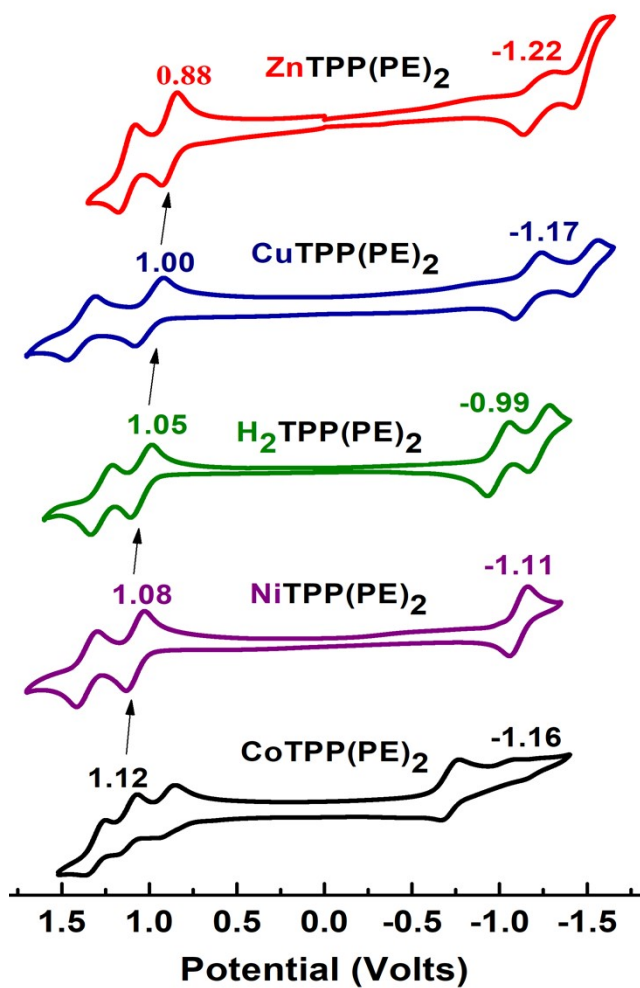

**Figure S12.** Cyclic voltammograms of MTPP(PE)<sub>2</sub> [M= Cu(II), Zn(II), Ni(II) and Co(II)] (~1 mM) in CH<sub>2</sub>Cl<sub>2</sub> containing 0.1 M TBAPF<sub>6</sub> using Ag/AgCl as reference electrode with a scan rate of 0.10 V/s at 298 K

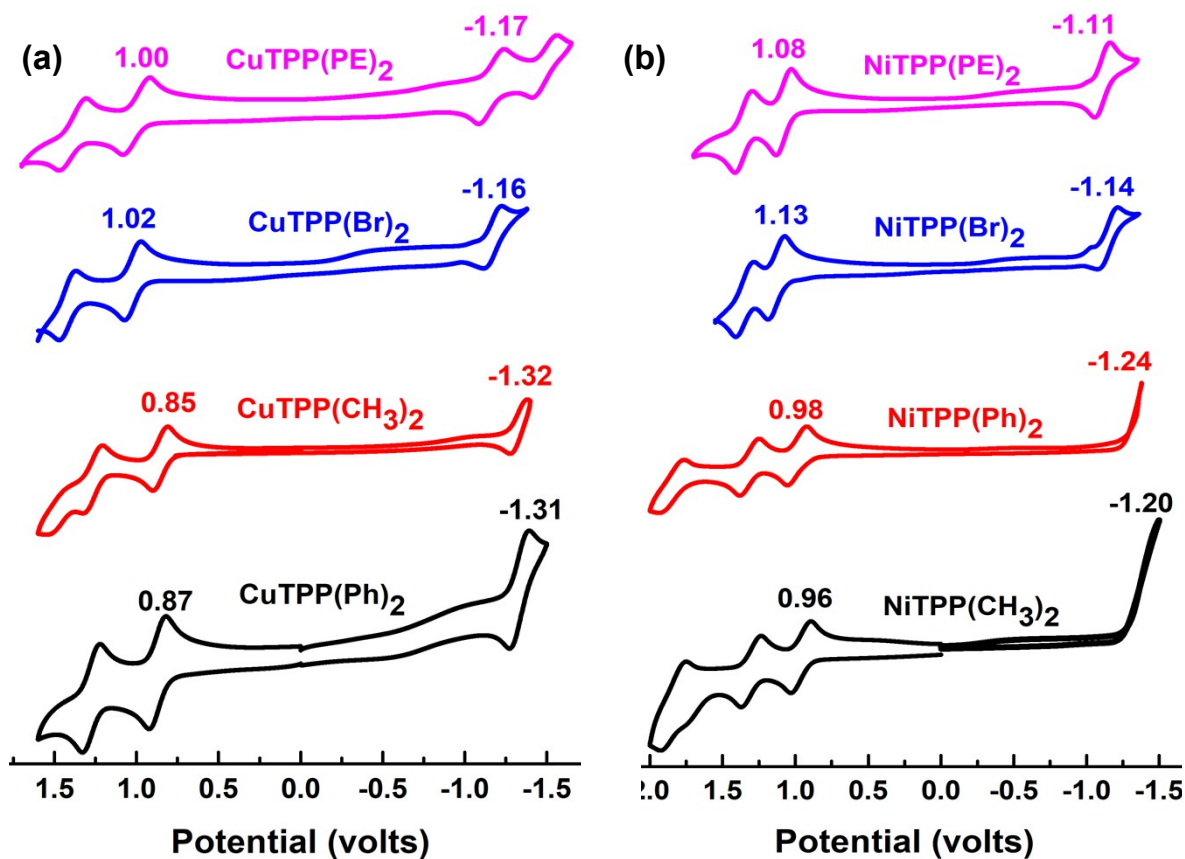

**Figure S13.** Cyclic voltammograms of (a) CuTPP(X)<sub>2</sub> [X=CH<sub>3</sub>, Ph, Br and PE] (b) NiTPP(X)<sub>2</sub> [X=CH<sub>3</sub>, Ph, Br and PE] (~1 mM) in CH<sub>2</sub>Cl<sub>2</sub> containing 0.1 M TBAPF<sub>6</sub> using Ag/AgCl as reference electrode with a scan rate of 0.10 V/s at 298 K.

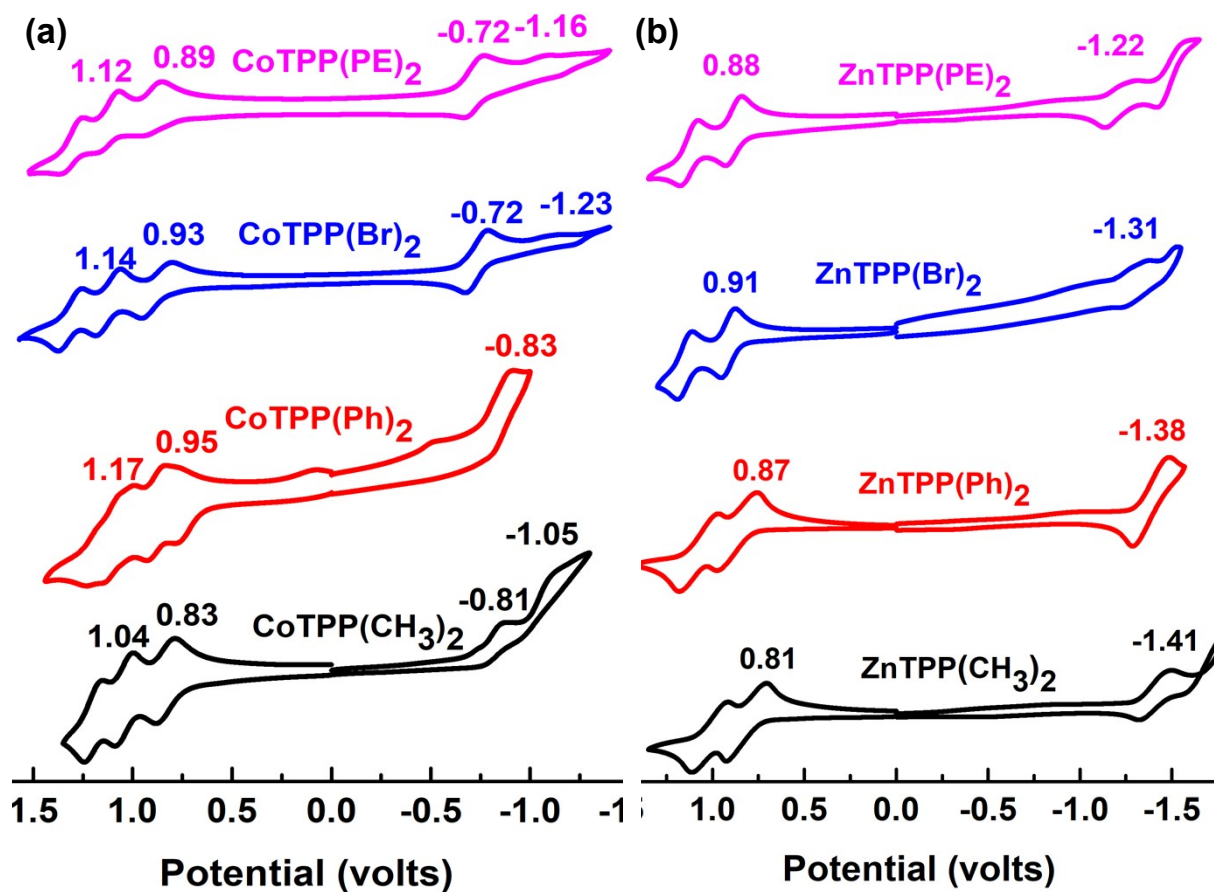

**Figure S14.** Cyclic voltammograms of (a) CoTPP(X)<sub>2</sub> [X= CH<sub>3</sub>, Ph, Br and PE] (Zn) NiTPP(X)<sub>2</sub> [X= CH<sub>3</sub>, Ph, Br and PE] (~1 mM) in CH<sub>2</sub>Cl<sub>2</sub> containing 0.1 M TBAPF<sub>6</sub> using Ag/AgCl as reference electrode with a scan rate of 0.10 V/s at 298 K.

Figure S15.  $^1\text{H}$  NMR spectrum of  $\text{H}_2\text{TPP}(\text{Br})_2$  in  $\text{CDCl}_3$  at 298 K.

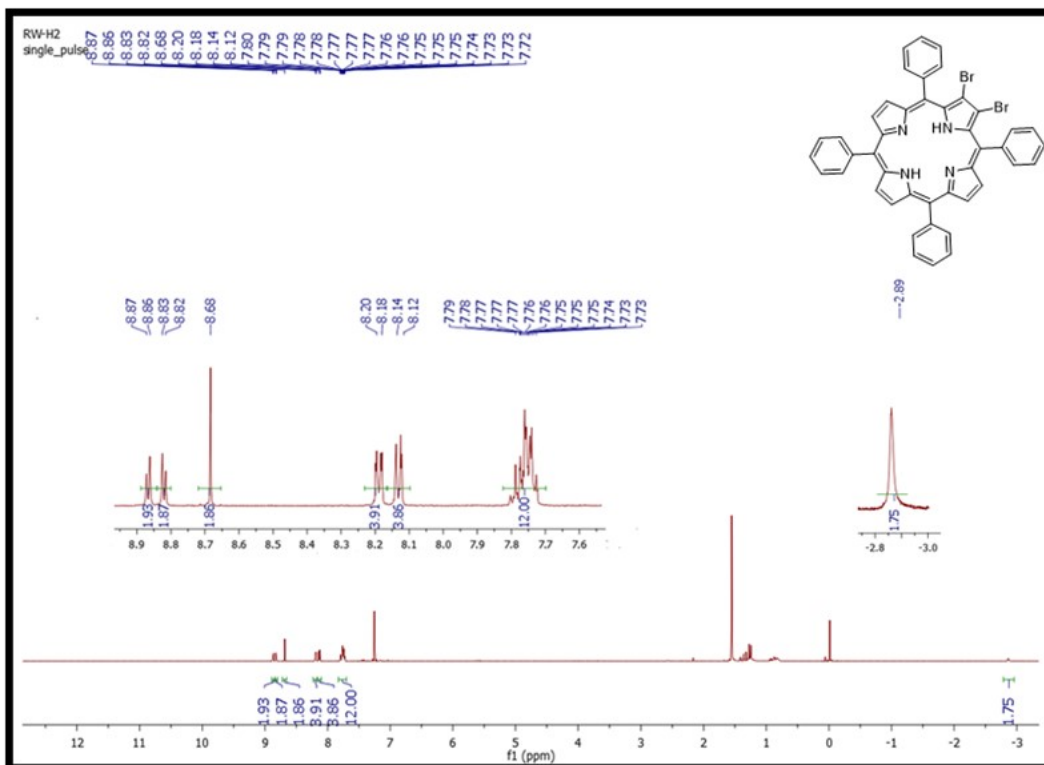

Figure S16.  $^1\text{H}$  NMR spectrum of  $\text{ZnTPP}(\text{Br})_2$  in  $\text{CDCl}_3$  at 298 K.

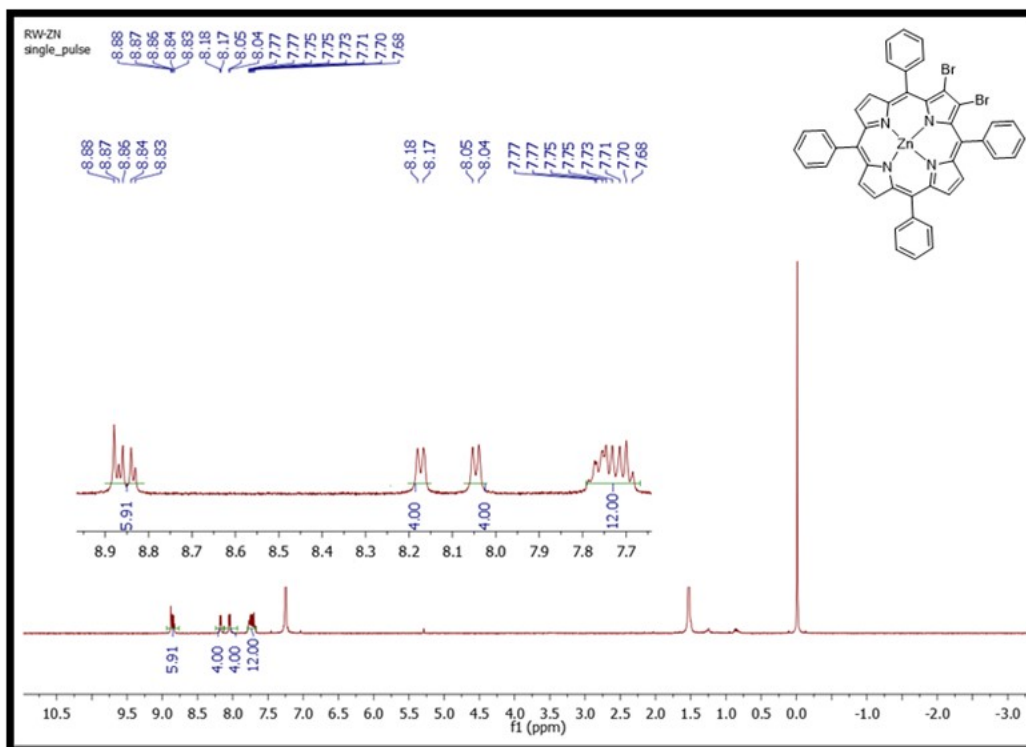

**Figure S17.**  $^1\text{H}$  NMR spectrum of  $\text{NiTPP}(\text{Br})_2$  in  $\text{CDCl}_3$  at 298 K.

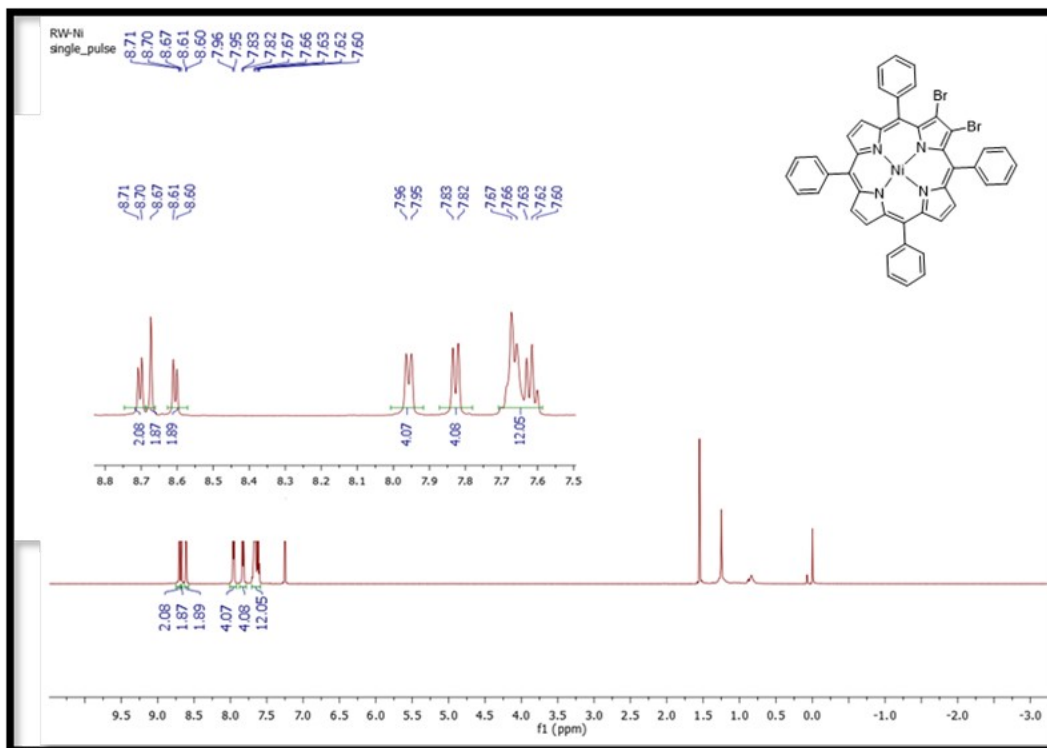

**Figure S18.**  $^1\text{H}$  NMR spectrum of  $\text{H}_2\text{TPP}(\text{CH}_3)_2$  in  $\text{CDCl}_3$  at 298 K.

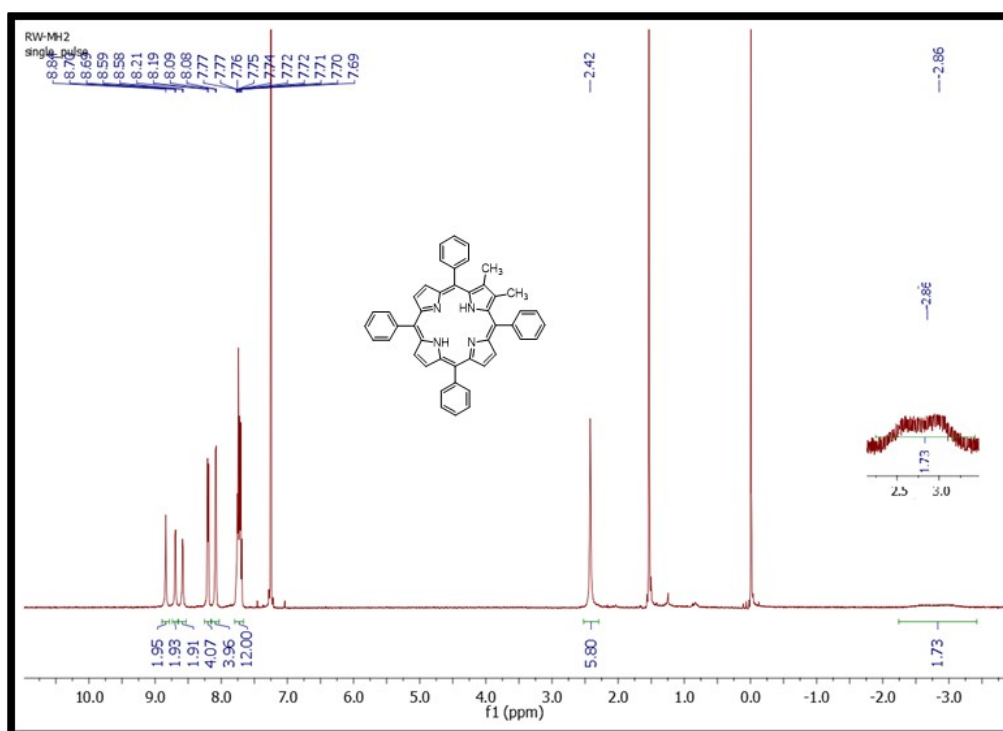

Figure S19.  $^1\text{H}$  NMR spectrum of  $\text{NiTPP}(\text{CH}_3)_2$  in  $\text{CDCl}_3$  at 298 K.

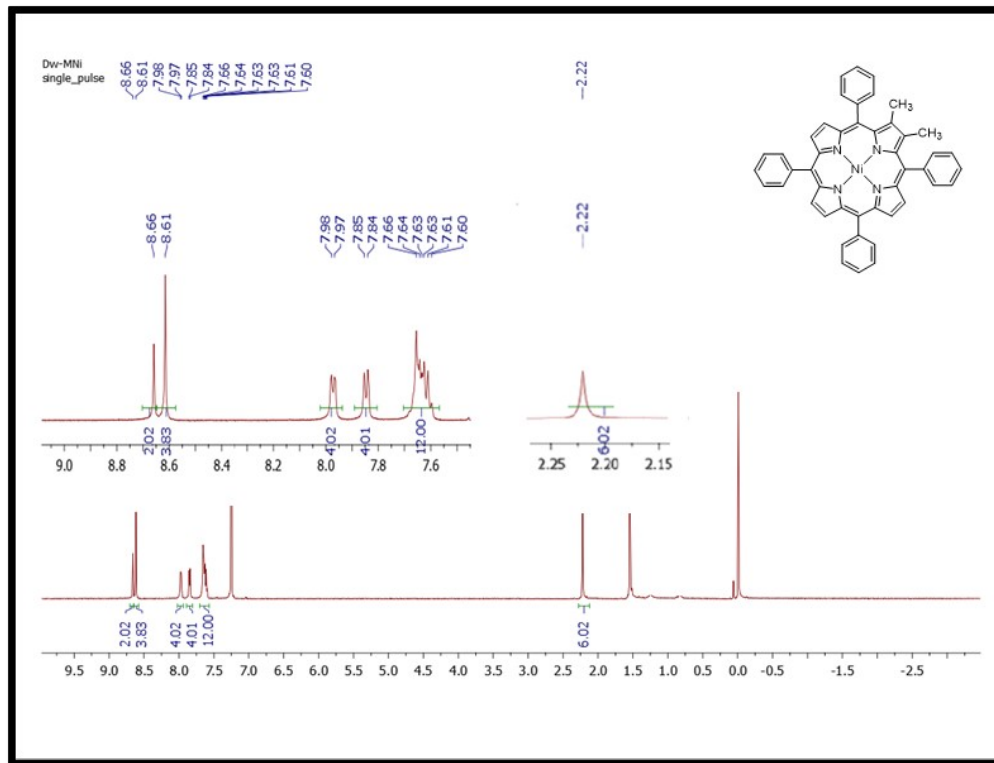

Figure S20.  $^1\text{H}$  NMR spectrum of  $\text{ZnTPP}(\text{CH}_3)_2$  in  $\text{CDCl}_3$  at 298 K.

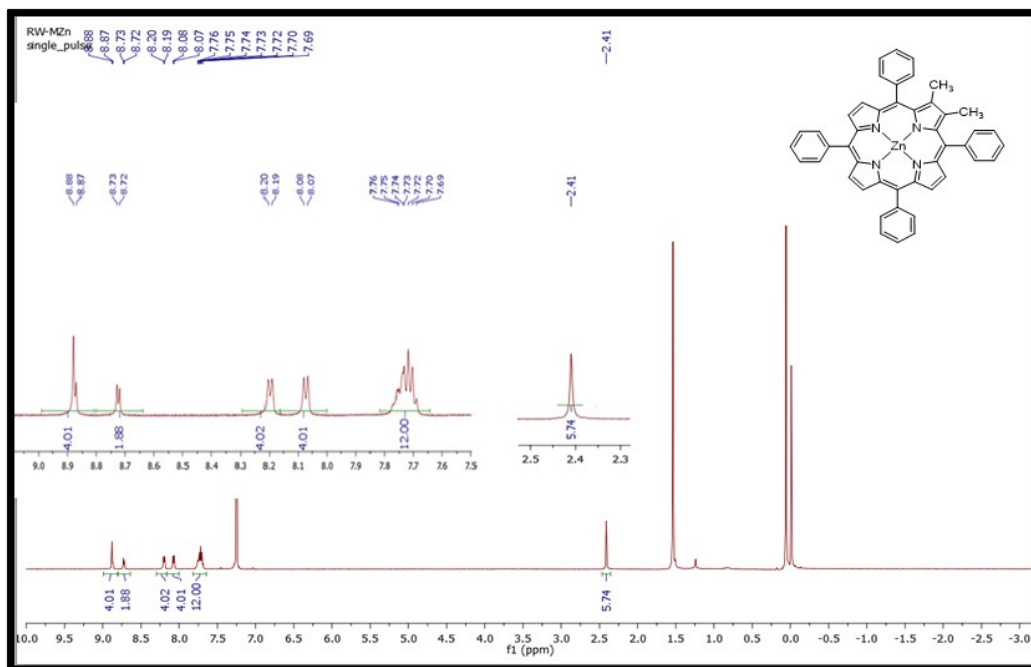

Figure S21. <sup>1</sup>H NMR spectrum of H<sub>2</sub>TPP(Ph)<sub>2</sub> in CDCl<sub>3</sub> at 298 K.

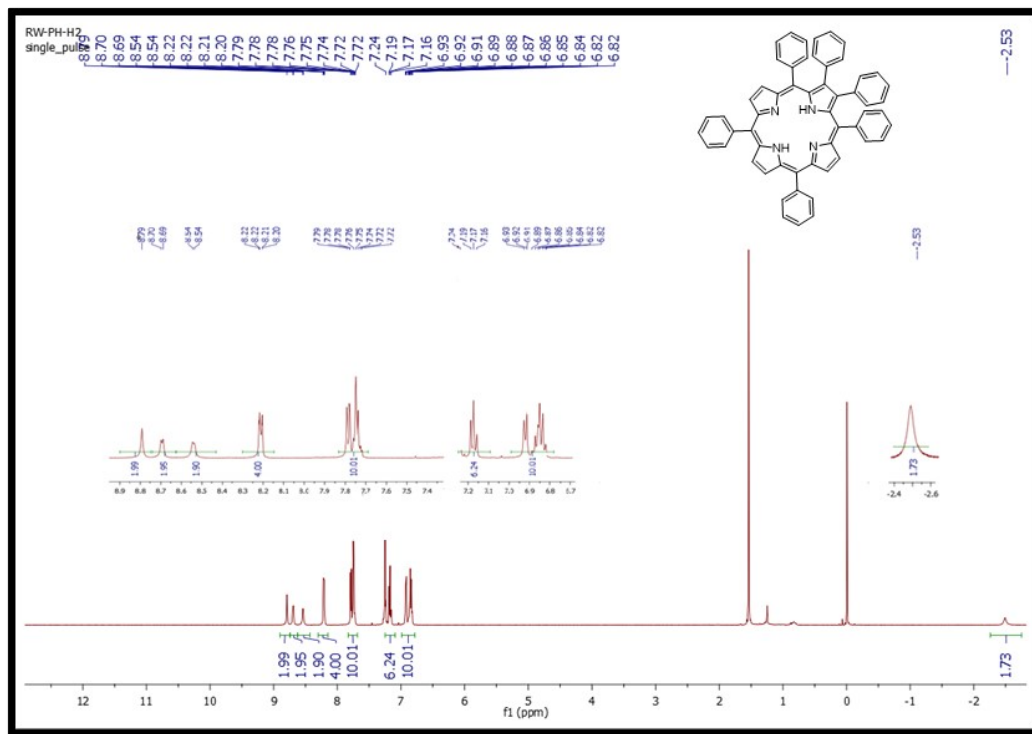

Figure S22. <sup>1</sup>H NMR spectrum of ZnTPP(Ph)<sub>2</sub> in CDCl<sub>3</sub> at 298 K.

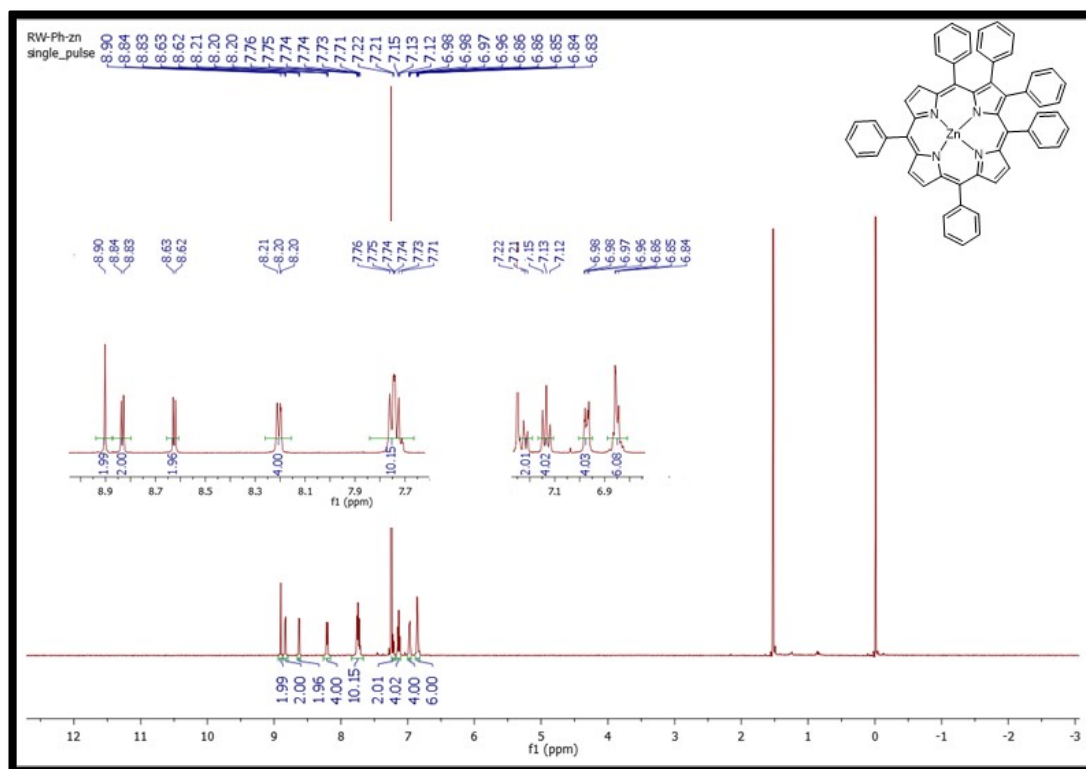





Figure S25.  $^1\text{H}$  NMR spectrum of  $\text{ZnTPP}(\text{PE})_2$  in  $\text{CDCl}_3$  at 298 K.

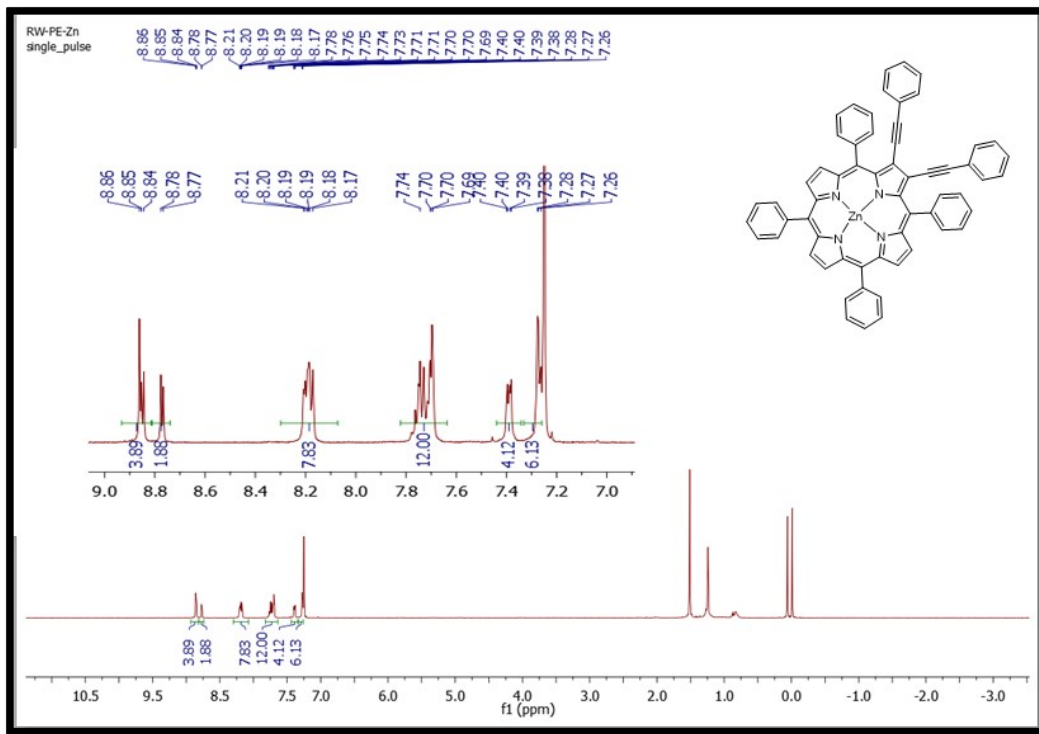

Figure S26.  $^1\text{H}$  NMR spectrum of  $\text{NiTPP}(\text{PE})_2$  in  $\text{CDCl}_3$  at 298 K.

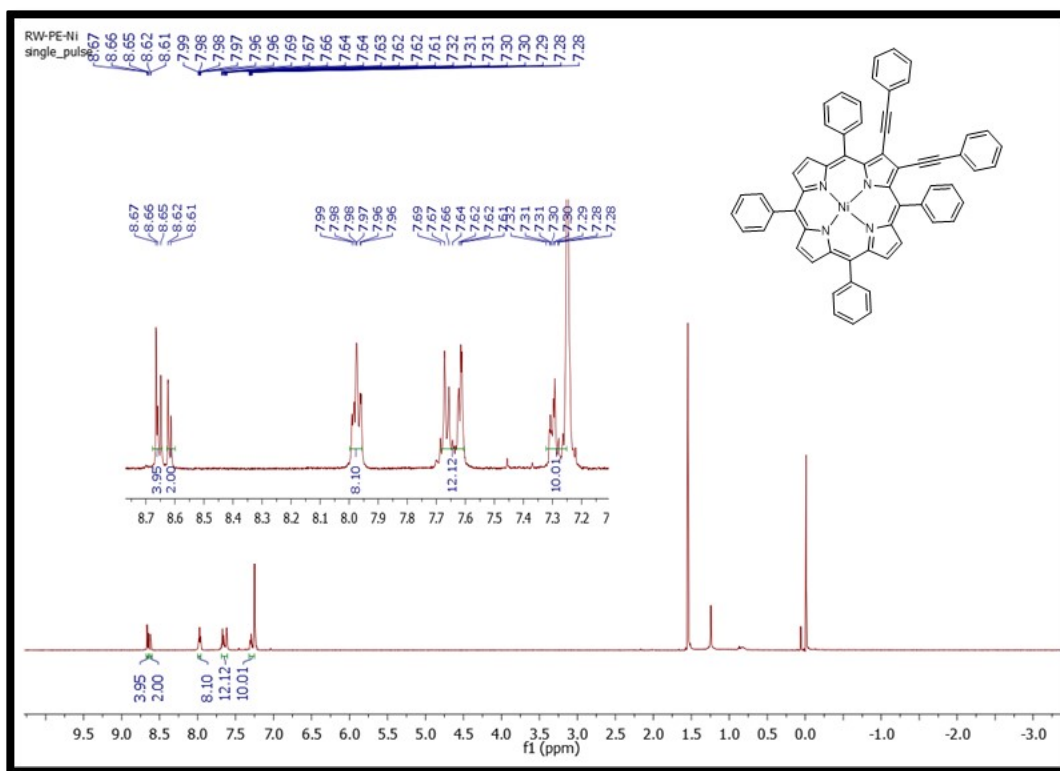

Figure S27. HRMS spectrum of H<sub>2</sub>TPP(Br)<sub>2</sub>.

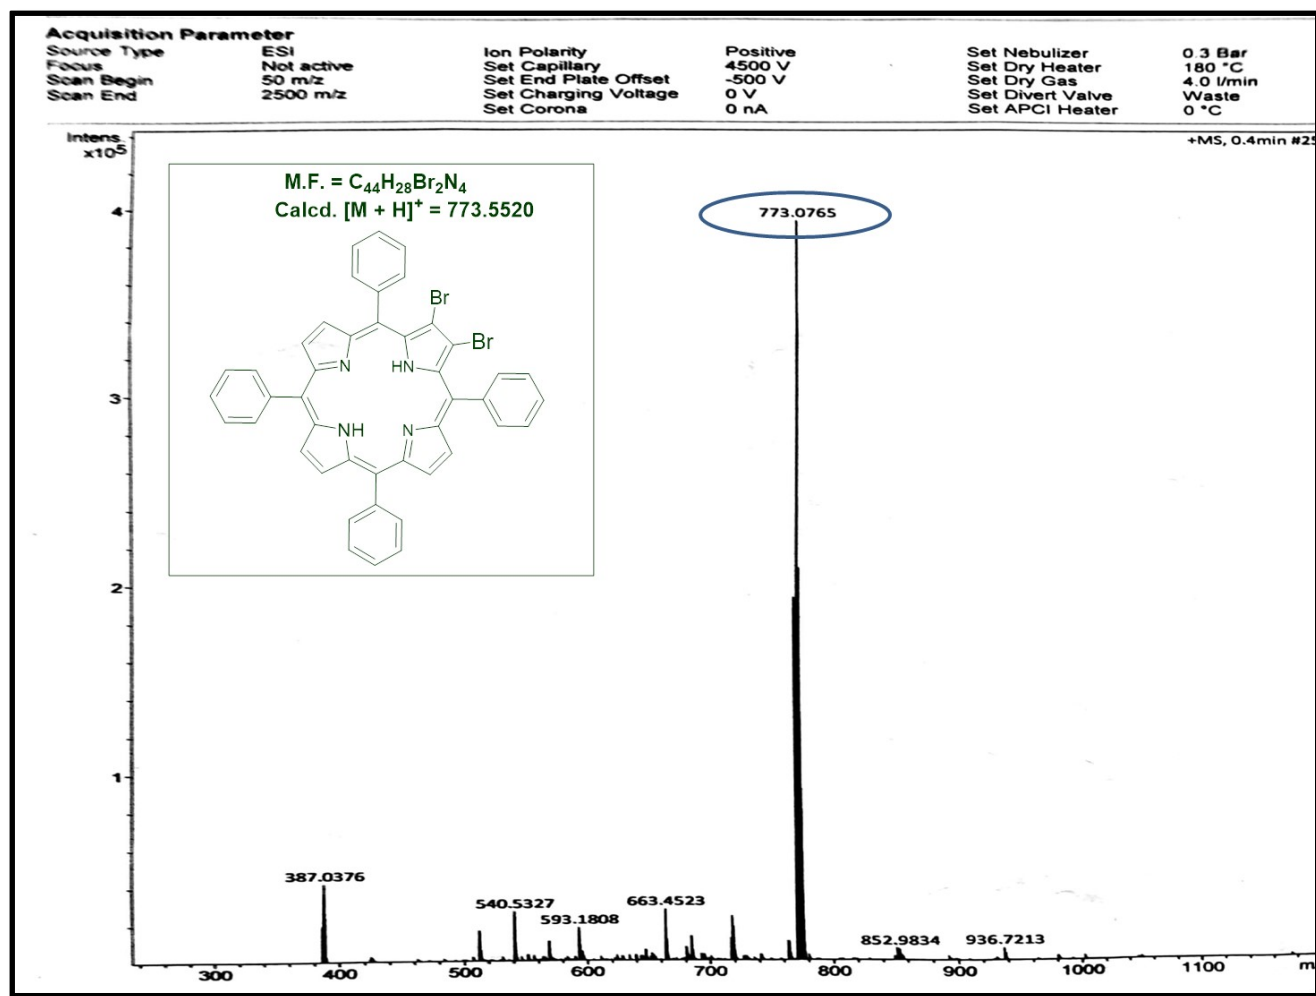

Figure S28. HRMS spectrum of ZnTPP(Br)<sub>2</sub>.

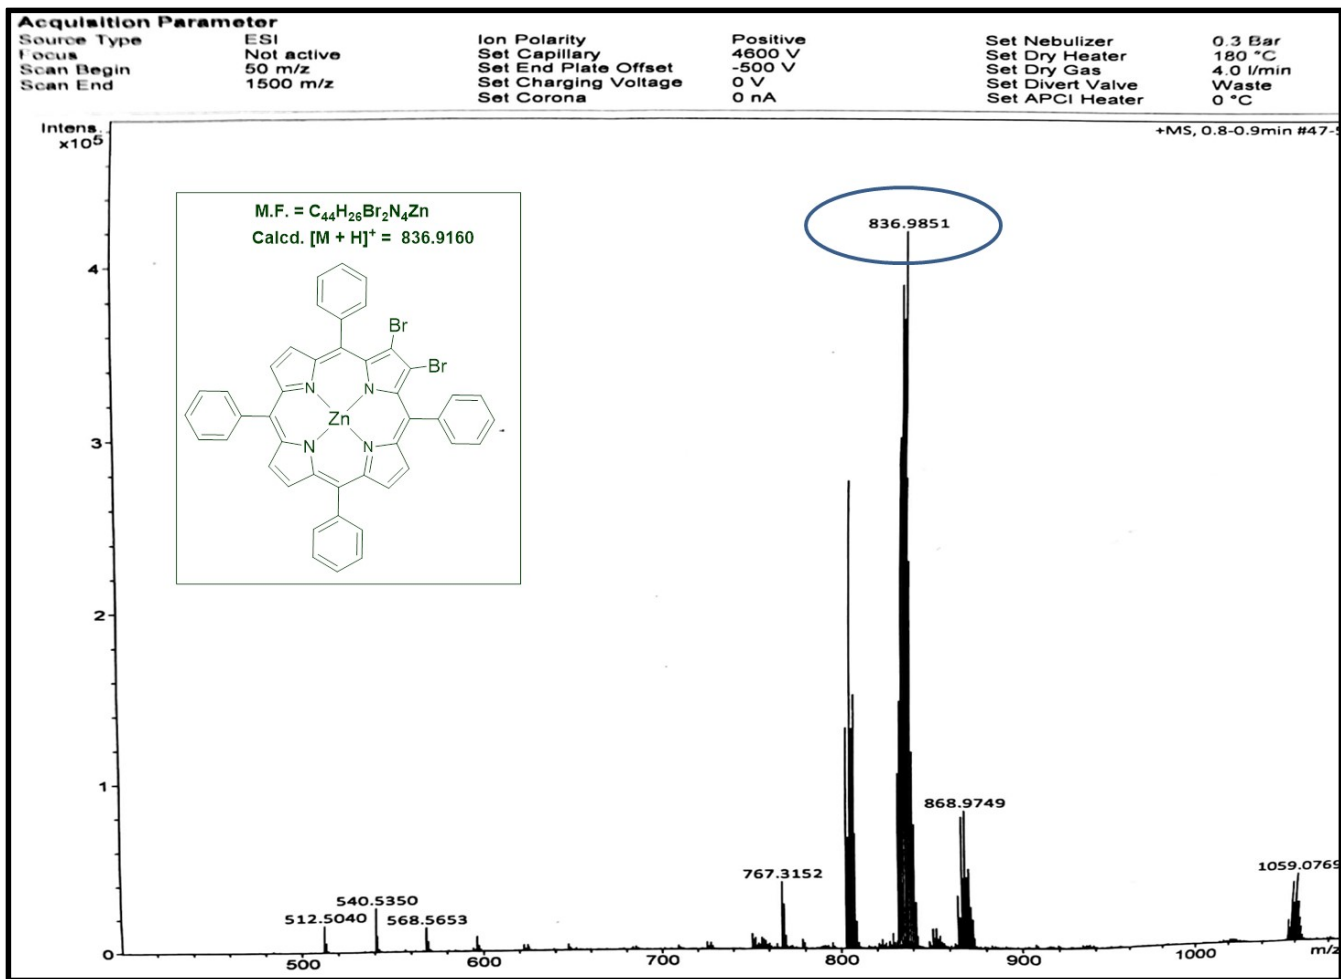

Figure S29. HRMS spectrum of H<sub>2</sub>TPP(CH<sub>3</sub>)<sub>2</sub>.

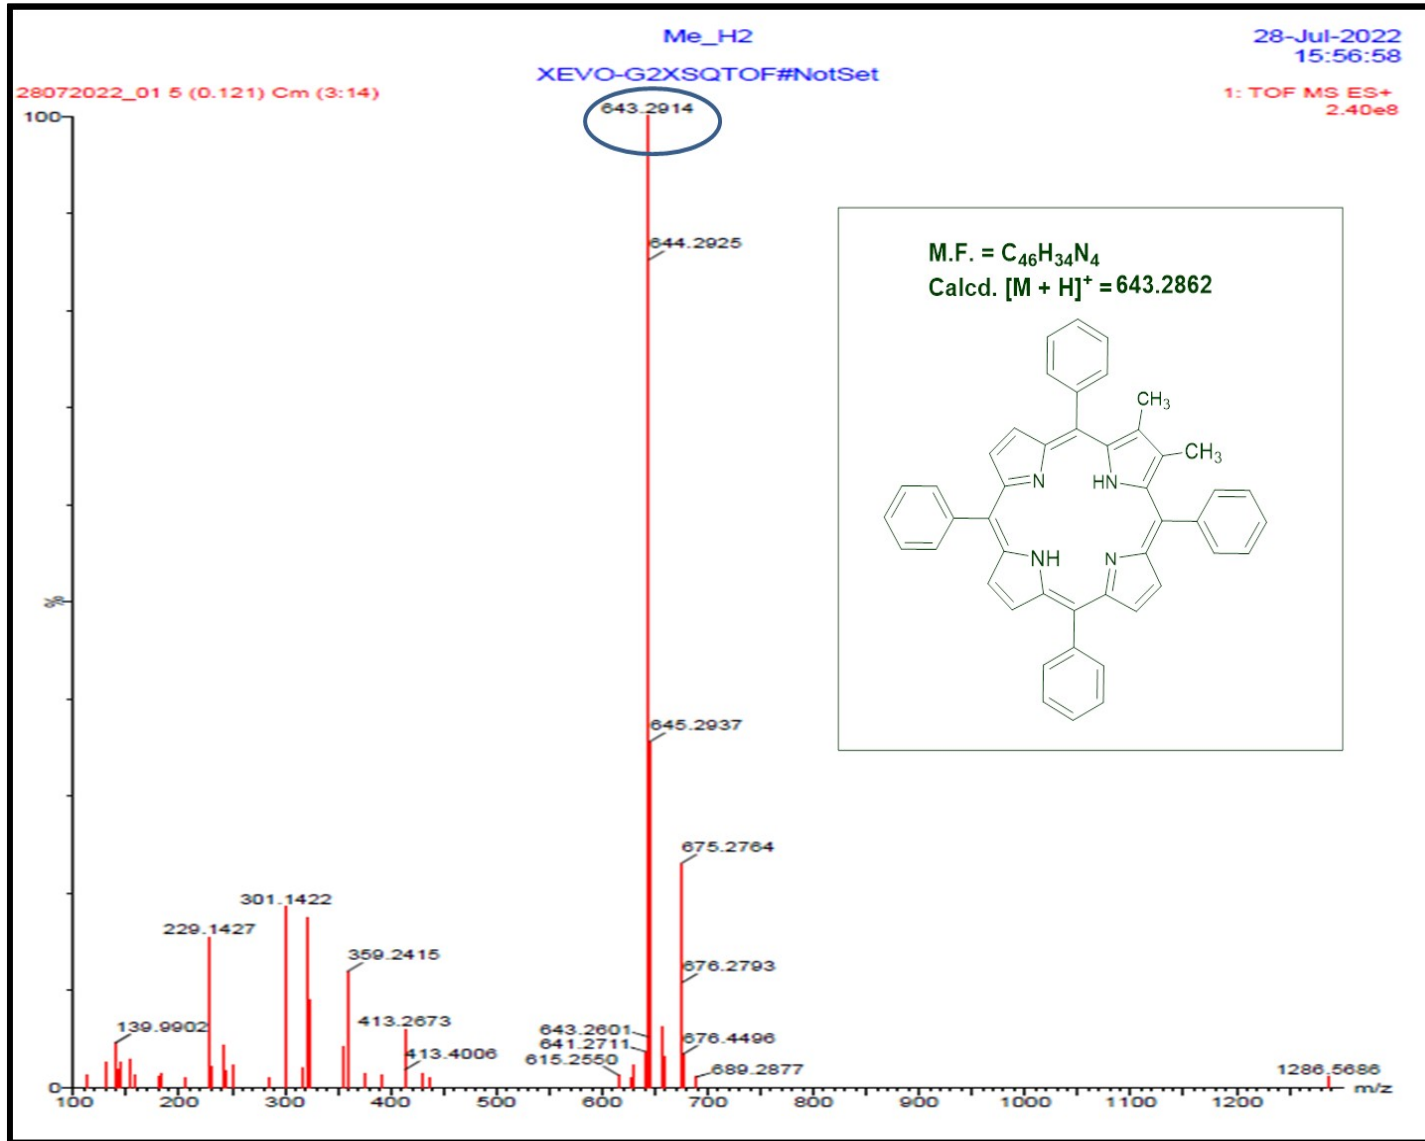

Figure S30. HRMS spectrum of CoTPP(CH<sub>3</sub>)<sub>2</sub>.

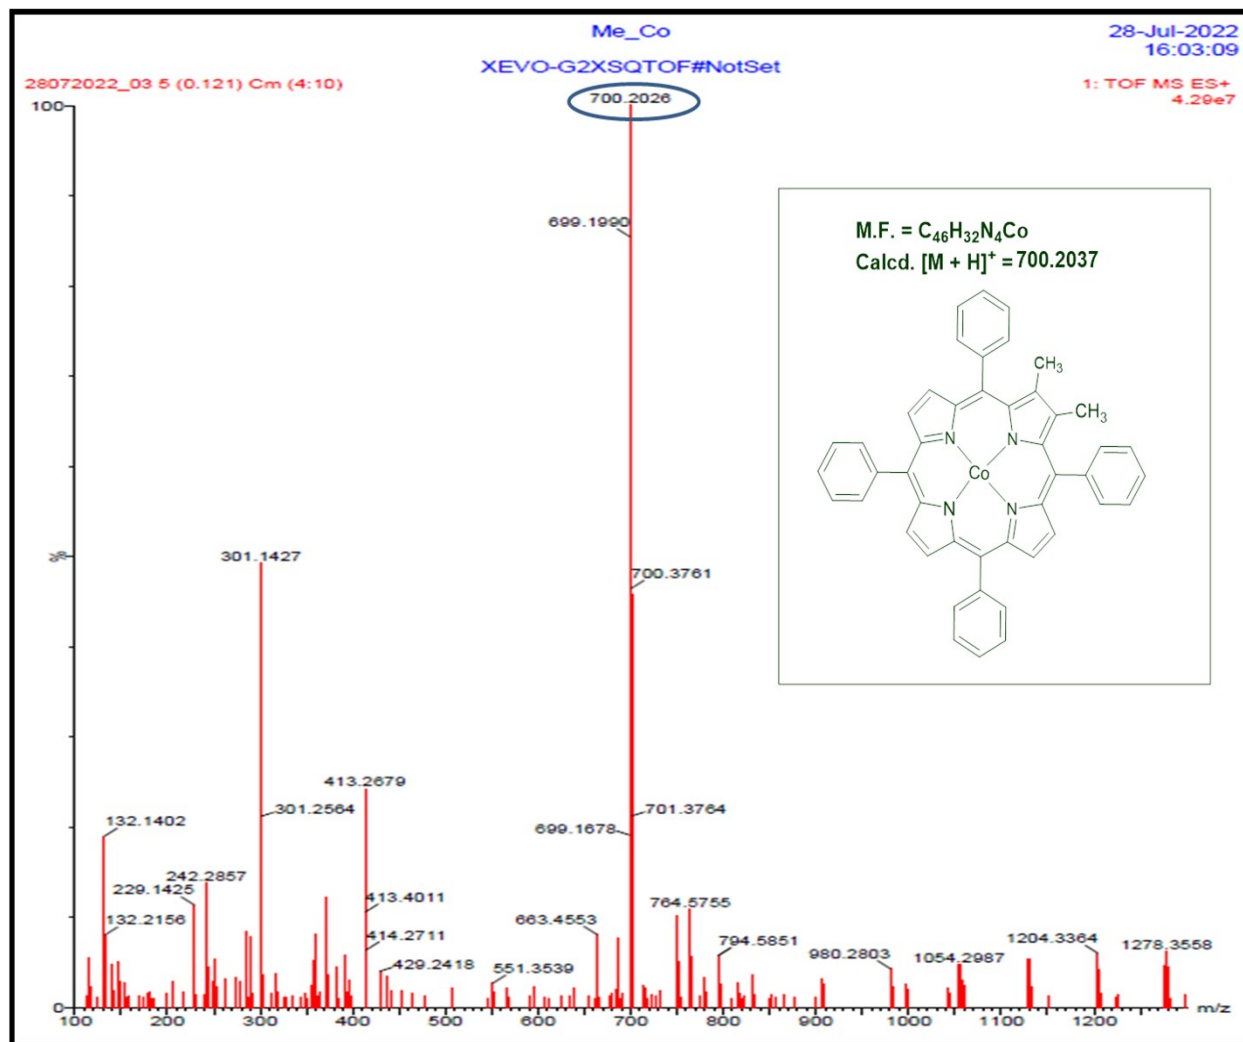

Figure S31. HRMS spectrum of ZnTPP(CH<sub>3</sub>)<sub>2</sub>.

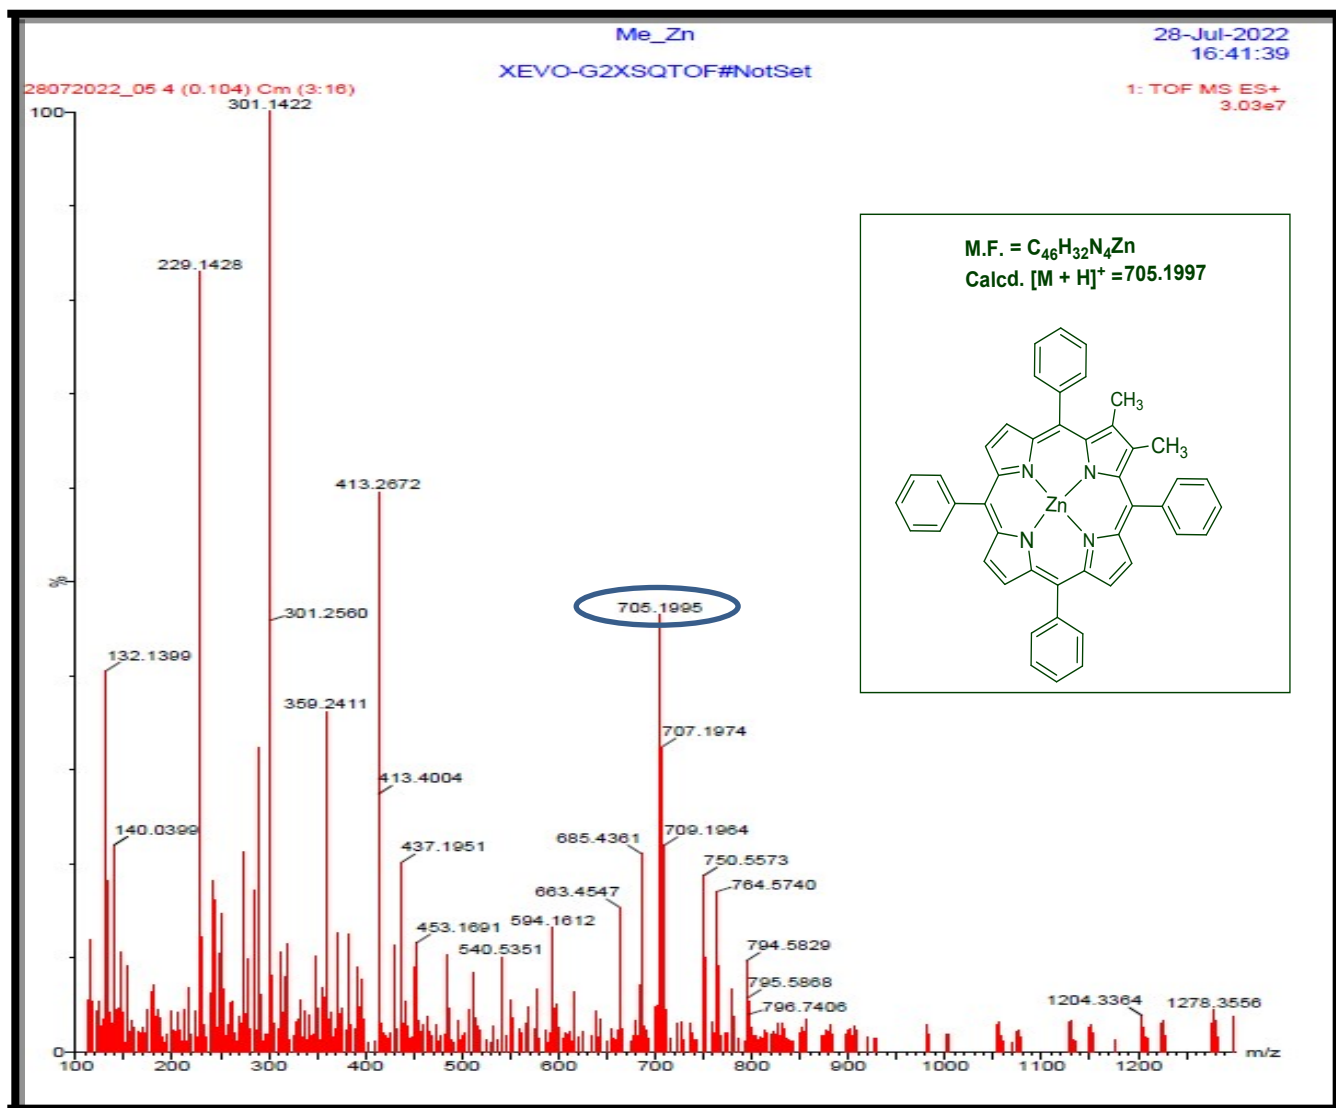

Figure S32. HRMS spectrum of NiTPP(CH<sub>3</sub>)<sub>2</sub>.

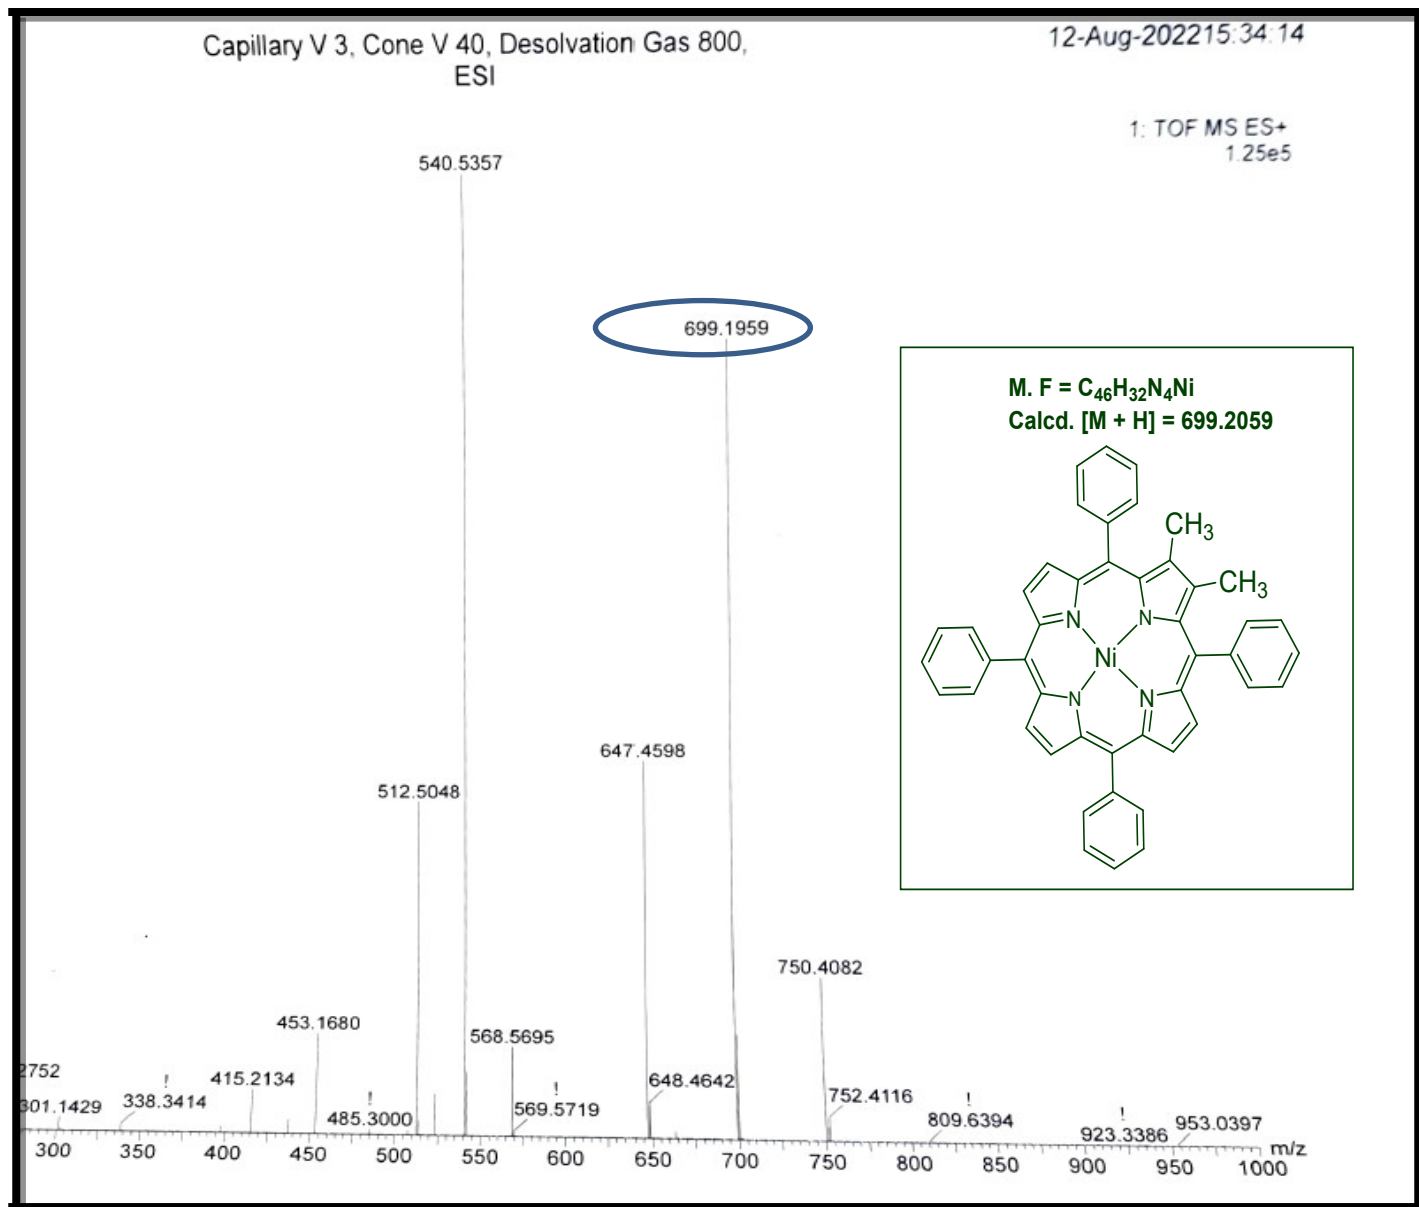



Figure S33. HRMS spectrum of H<sub>2</sub>TPP(PE)<sub>2</sub>.

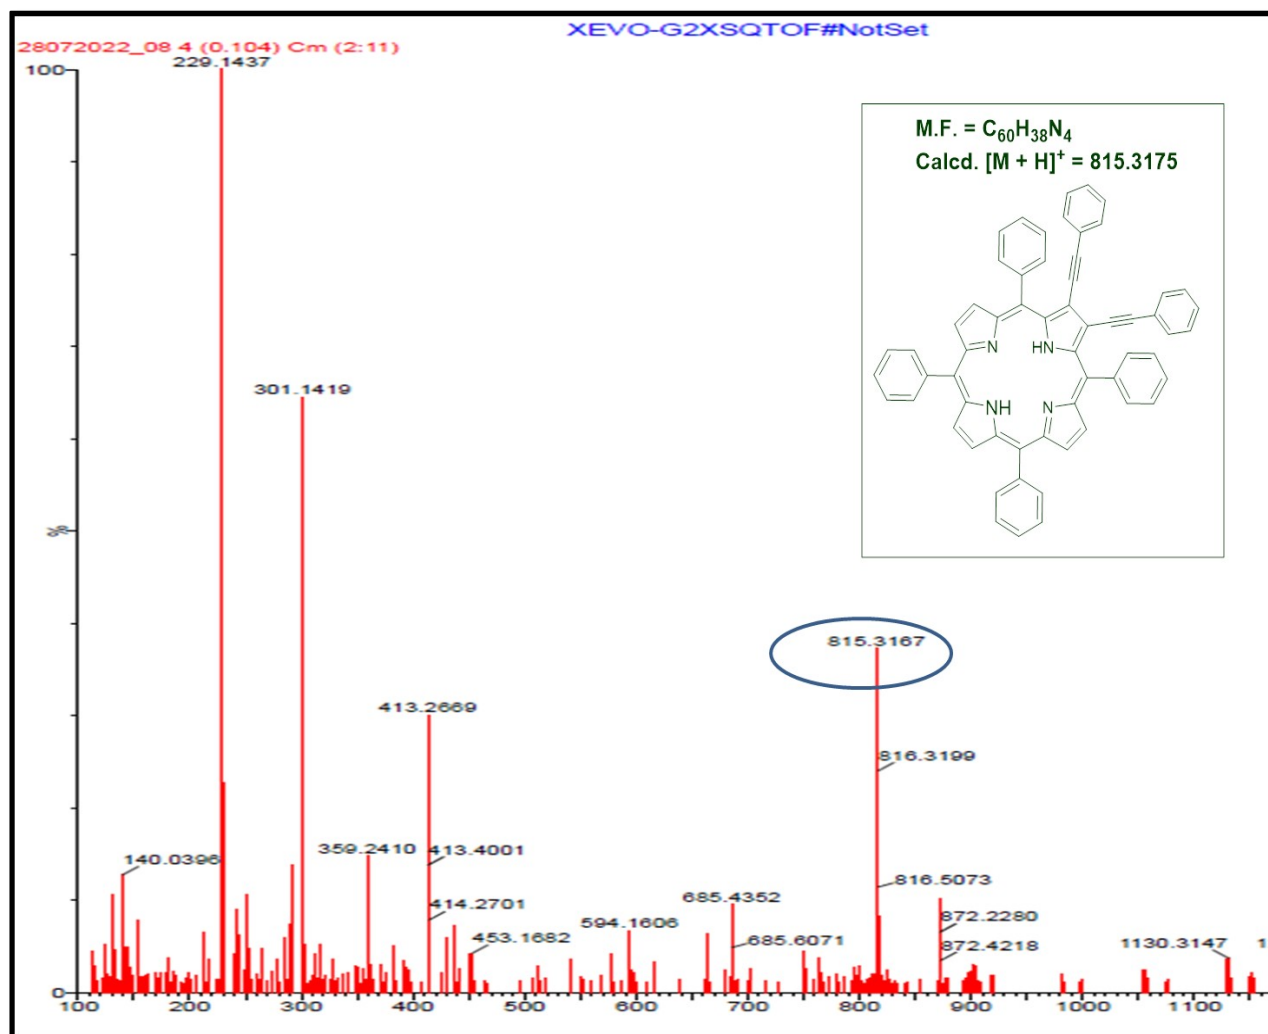

Figure S34. HRMS spectrum of CoTPP(PE)<sub>2</sub>.

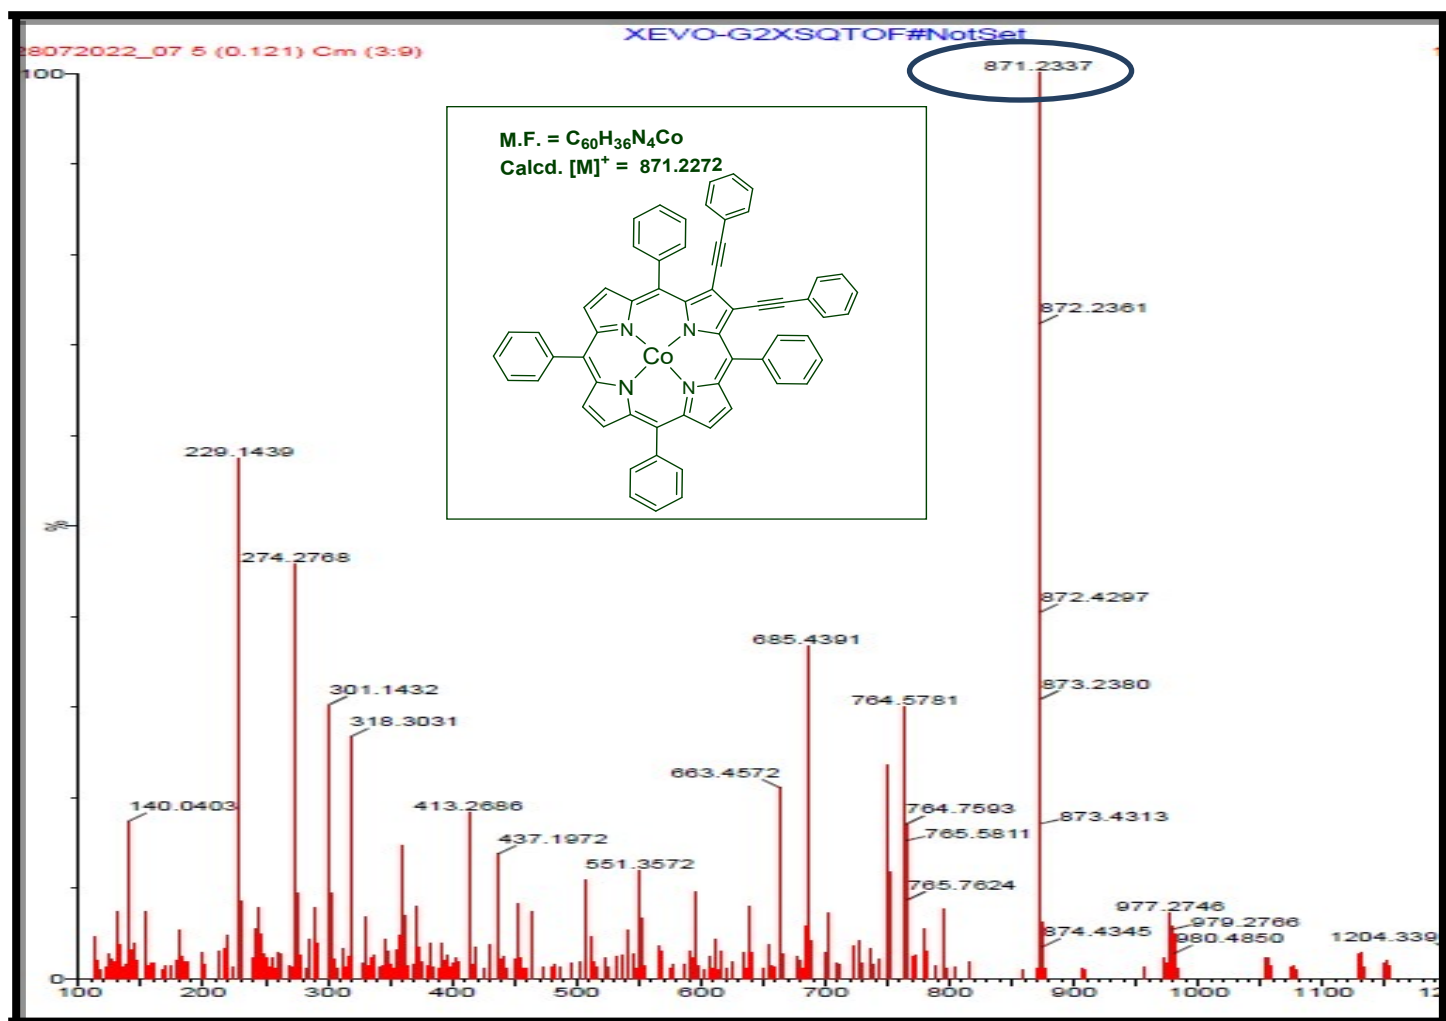

Figure S35. HRMS spectrum of H<sub>2</sub>TPP(Ph)<sub>2</sub>.

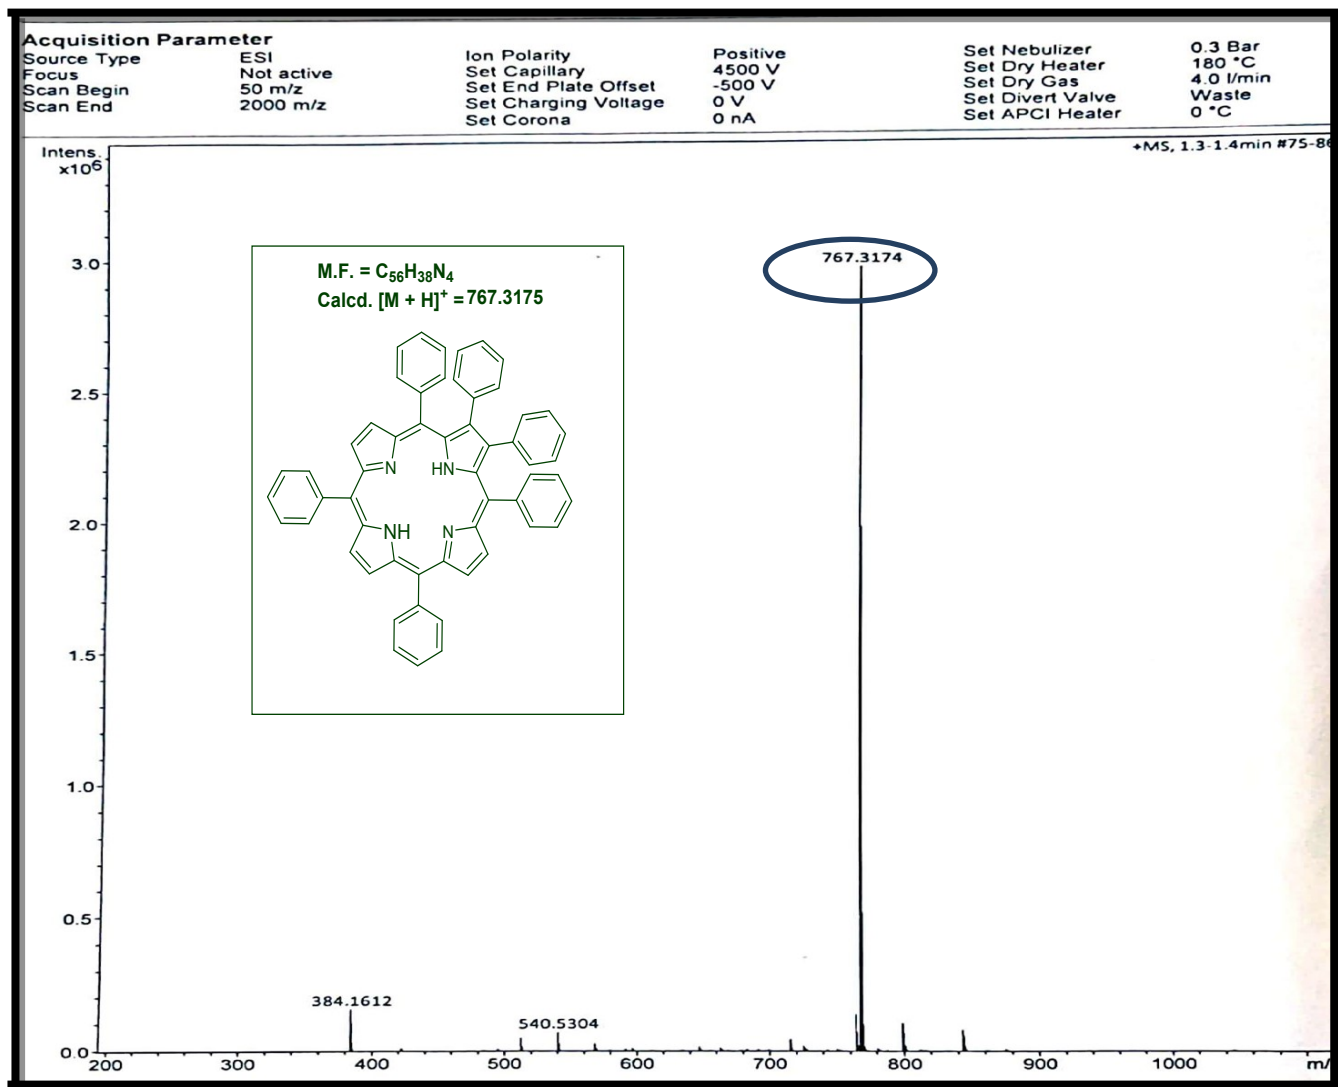

Figure S36. HRMS spectrum of CuTPP(Ph)<sub>2</sub>.

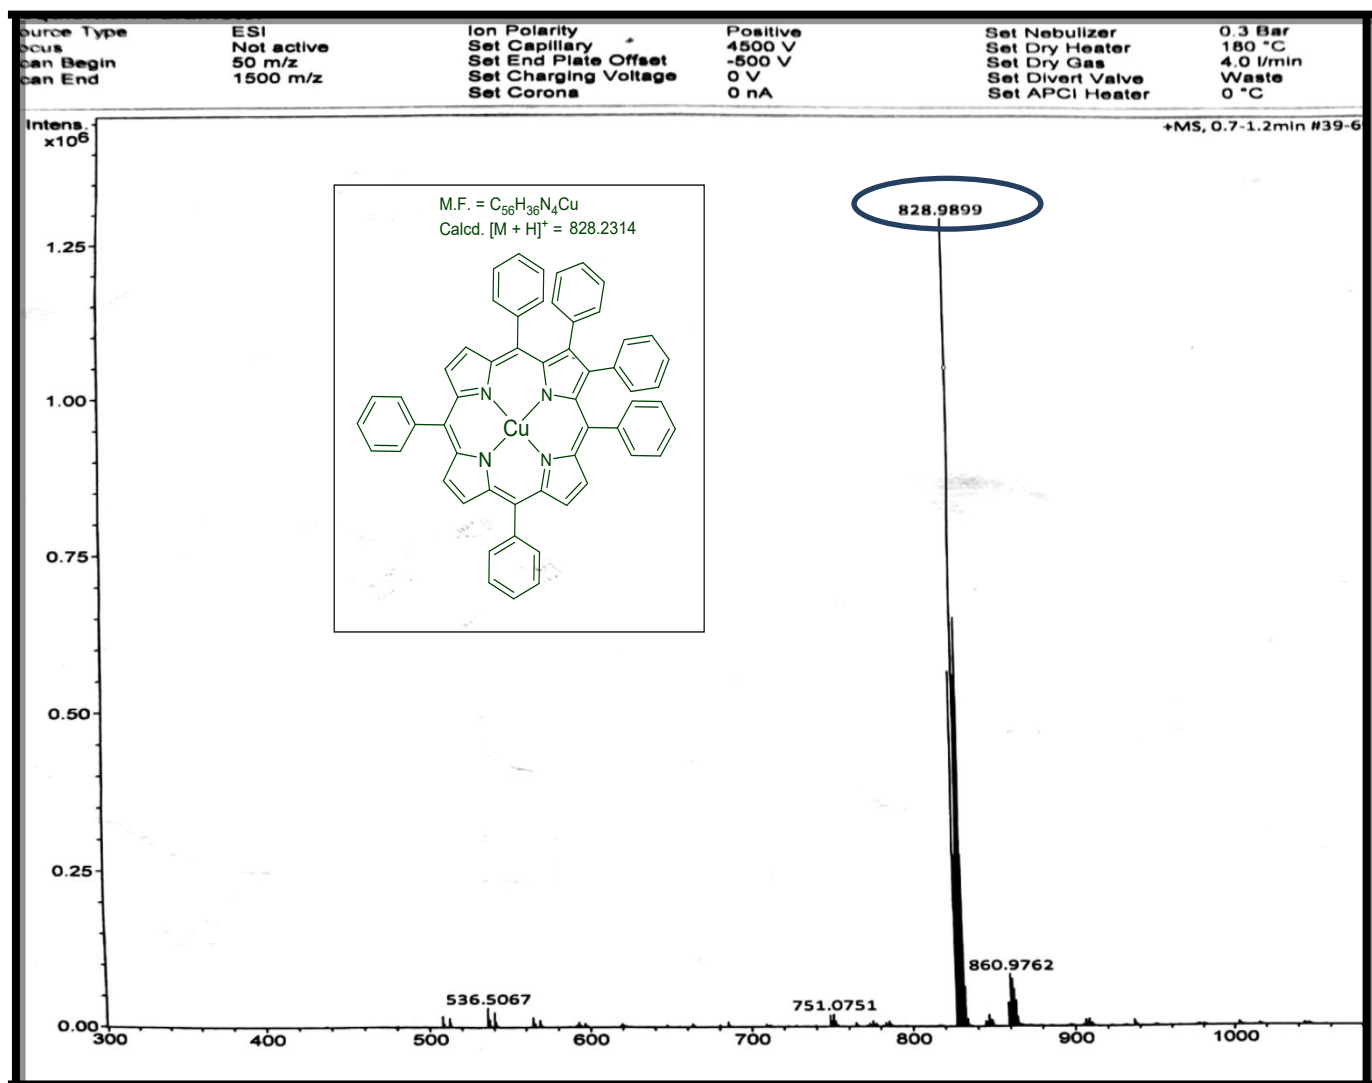

Figure S37. HRMS spectrum of CoTPP(Ph)<sub>2</sub>.

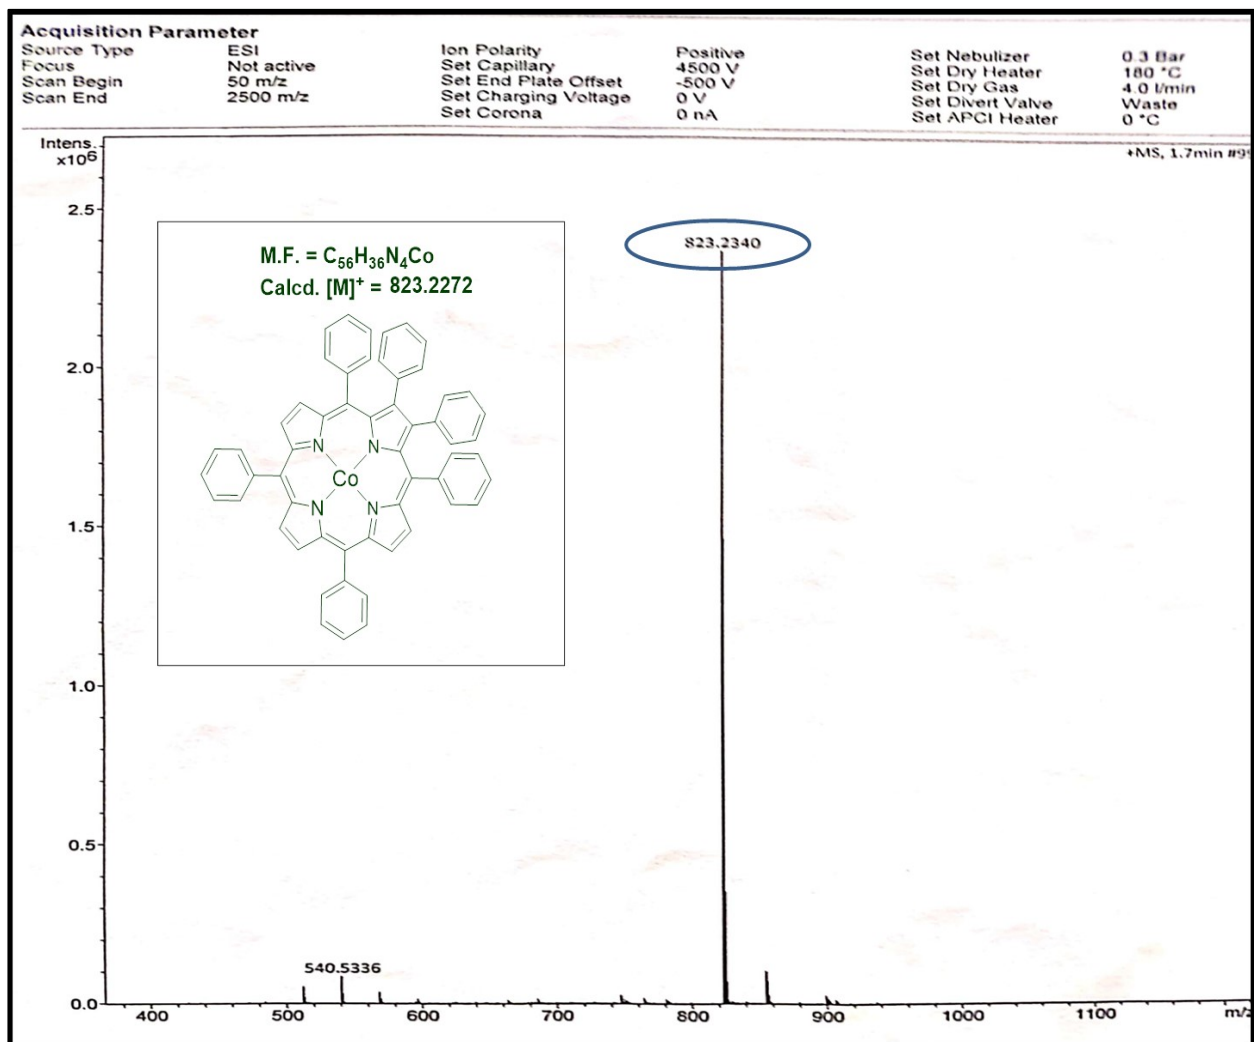

Figure S38. HRMS spectrum of ZnTPP(Ph)<sub>2</sub>.

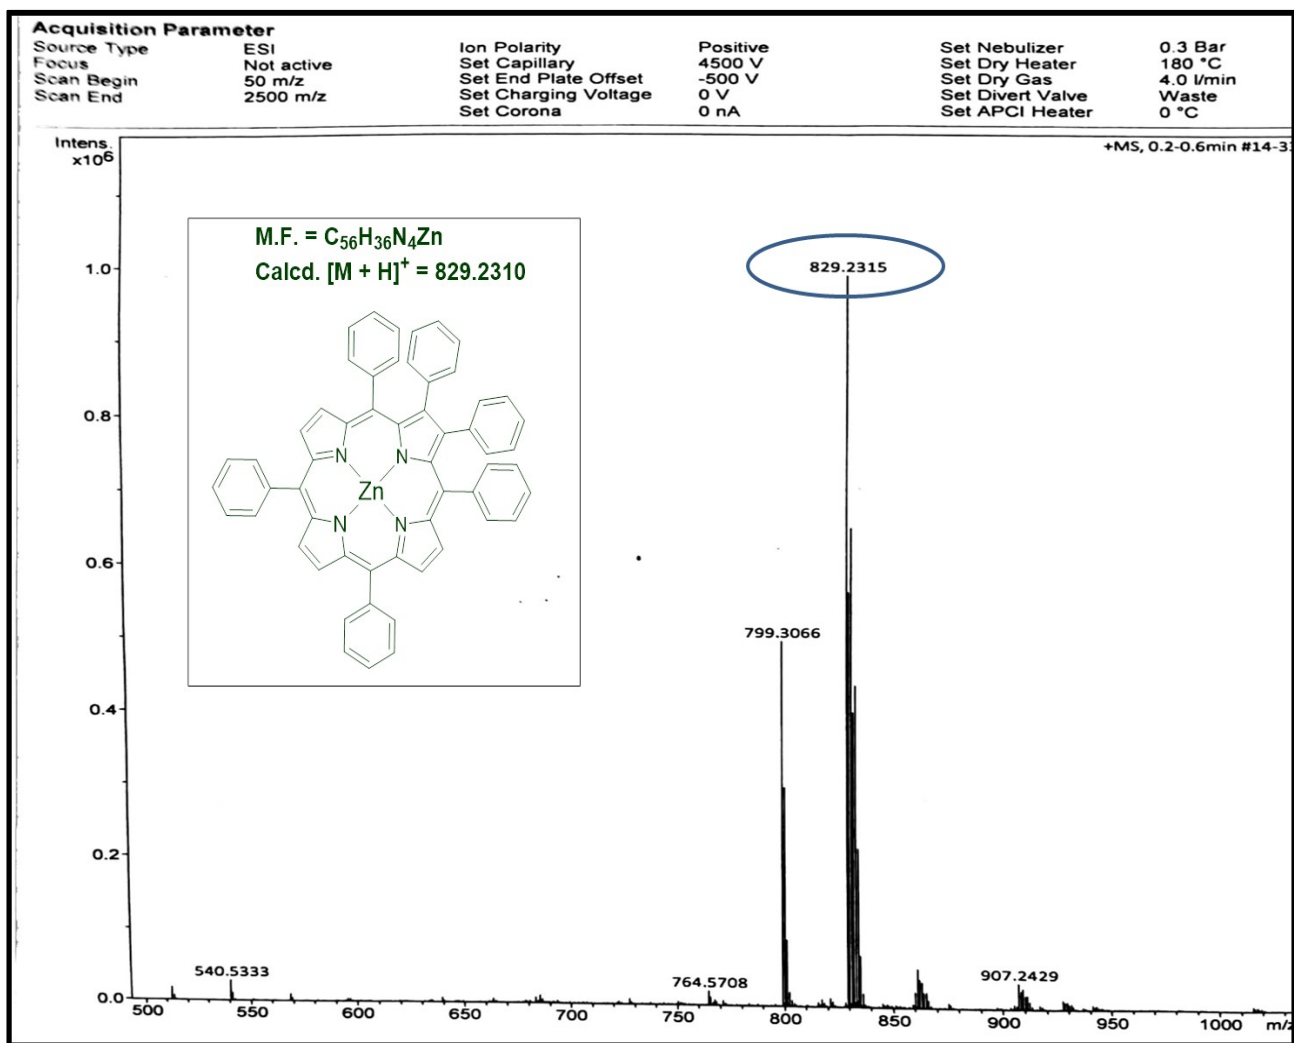

Supplement: d3nj01288c1.pdf [file d3nj01288c1.pdf]
